# Supplementary material for: Application of CNTF or FGF-2 increases the number of M2-like macrophages after optic nerve injury in adult Rana pipiens
Source: PLoS One. 2019 May 2;14(5):e0209733. doi: 10.1371/journal.pone.0209733 (PMC6507305; doi:10.1371/journal.pone.0209733)
Supplement: S2 Table — (XLSX) [file pone.0209733.s002.xlsx]

## Sheet: PBS1w
																								pixel size	0.3114
		Overall Means	Overall Means																				B5	PBS 1w 1900 1110u 20x A-C
Nerve area	Nerve diam	Cells/mm2	Cell#	Av Area	Tot Cell Area	Area frac	Mean intens	Stdev	Circ.	Feret	%Periph	CentrSD	PeriphSD	C/P Ratio		Nerve area	Nerve Feret (diam)	Centroid X	Centroid Y	Cell#	Area	Tot Area	Area frac	Mean	Stdev	Mode	Min	Max	XM	XY	Circ.	Feret	FeretX	FeretY	FeretAngle	MinFeret	AR	Round	Solidity	Min Thr	Max Thr	Centr dist	%Center	%Periph	CentrSD	PeriphSD		Nerve area	Nerve Feret (diam)
156177	483.613	643.954	93	171.826	15760.7	0.118242	116.598	40.8052	0.774364	18.2597	51.5579	41.3963	41.1268	1.00457		88599.9	388.506	276.346	190.881	71	244.026	17325.8	0.195551	116.409	50.8587	96.0141	33.0423	244.085			0.83669	21.1017										111.352	32.3944	67.6056	54.035	49.3366		124313	428.148
52625.4	92.9254	179.995	12	53.9206	4533.42	0.0627719	6.8995	7.07404	0.0460545	2.12026	16.2577	9.05152	6.11912	0.141932							116.704			22.8176	7.71406	40.7597	13.4827	8.19886			0.0614481	5.53895										40.7666			7.60075	7.36763
6	6	6	6	6	6	6	6	6	6	6	6	6	6	6						SEM	13.8502			2.70795	0.91549	4.83729	1.60011	0.973026			0.00729255	0.657352										4.83811			1.0658	0.7519
21484.2	37.9366	73.4825	4.89898	22.013	1850.76	0.0256265	2.81671	2.88796	0.0188017	0.865593	6.63716	3.69527	2.49812	0.0579433
																913684	1247.61	887.43	612.976	71	2516.51	178672		116.409	50.8587	96.0141	33.0423	244.085			0.83669	67.764										357.584	32.3944	67.6056	54.035	49.3366		1281975	1374.91
																					1203.51			22.8176	7.71406	40.7597	13.4827	8.19886			0.0614481	17.7872										130.914			7.60075	7.36763
88599.9	388.506	801.355	71	244.026	17325.8	0.195551	116.409	50.8587	0.83669	21.1017	67.6056	54.035	49.3366	1.09523						SEM	142.83			2.70795	0.91549	4.83729	1.60011	0.973026			0.00729255	2.11096										15.5366			1.0658	0.7519
124313	428.148	796.376	99	213.412	21127.8	0.169957	127.573	46.112	0.809293	19.7669	59.596	46.6534	45.7449	1.01986
154865	462.503	613.436	95	162.973	15482.4	0.0999734	109.051	42.1348	0.778379	18.2213	55.7895	46.5862	38.6073	1.20667						1	3865			89.083	43.026	70	10	247	1187.69	189.888	0.772	97.739	1142	188	172.948	53	1.817	0.55	0.971	0	255	518.807		1		43.026
224503	613.64	396.432	89	114.044	10149.9	0.0452108	116.122	31.2167	0.743708	15.7302	29.2135	30.9701	31.8141	0.973472						2	1851			91.172	40.136	69	26	233	756.611	227.008	0.683	75.186	720	233	13.851	32.413	2.446	0.409	0.954	0	255	407.535		1		40.136
133217	424.334	788.185	105	187.405	19677.5	0.14771	109.9	38.2678	0.771086	18.8082	63.8095	36.8697	39.0607	0.943908						3	2268			124.159	53.266	71	44	244	1144.41	250.195	0.915	56.939	1129	227	120.619	52	1.044	0.958	0.973	0	255	444.577		1		53.266
211566	584.545	467.939	99	109.095	10800.4	0.0510498	120.533	36.2413	0.70703	15.9299	33.3333	33.2634	42.1971	0.788286						4	1328			129.872	55.73	96	42	243	1033.18	247.258	0.91	45.354	1012	252	14.036	40.093	1.074	0.931	0.958	0	255	393.693		1		55.73
																				5	2255			110.816	49.796	143	35	249	1048.21	294.751	0.888	62.177	1037	323	62.199	48.083	1.28	0.781	0.967	0	255	356.537		1		49.796
																				6	1541			108.945	47.532	52	32	241	868.441	296.633	0.89	50.448	860	273	103.761	39.855	1.277	0.783	0.966	0	255	316.912		1		47.532
																				7	6531			138.22	60.25	230	31	249	917.645	328.761	0.772	111.571	893	277	104.534	84.725	1.371	0.729	0.933	0	255	285.817	1		60.25
																				8	2578			137.239	56.121	81	42	249	653.336	299.908	0.861	71.197	617	303	10.521	45.956	1.52	0.658	0.971	0	255	390.911		1		56.121
																				9	1619			105.731	41.682	87	40	239	830.266	322.839	0.921	49.244	817	344	66.038	44	1.065	0.939	0.971	0	255	295.715	1		41.682
																				10	3594			138.532	57.154	237	34	249	1102.84	327.189	0.825	82.97	1065	344	15.376	55.36	1.51	0.662	0.964	0	255	357.874		1		57.154
																				11	1232			113.009	49.801	81	47	237	707.164	317.364	0.91	44.654	689	329	34.046	38	1.149	0.87	0.963	0	255	346.24		1		49.801
																				12	2901			118.827	45.12	96	30	249	1326.4	368.941	0.905	67.052	1294	380	17.354	58	1.128	0.886	0.972	0	255	502.241		1		45.12
																				13	4713			141.819	59.714	118	42	249	1023.23	396.077	0.85	93.648	1012	440	83.254	67.889	1.366	0.732	0.964	0	255	255.904	1		59.714
																				14	2156			122.579	47.186	118	39	243	1170.58	388.892	0.838	63.953	1164	421	80.096	43.556	1.451	0.689	0.954	0	255	361.094		1		47.186
																				15	3235			109.798	45.679	90	42	247	725.282	416.415	0.81	76.557	688	405	156.114	57.529	1.343	0.744	0.955	0	255	254.81	1		45.679
																				16	2387			120.072	49.852	118	36	242	614.759	422.099	0.887	60	599	450	53.13	53.979	1.088	0.919	0.969	0	255	332.842		1		49.852
																				17	1723			119.519	44.287	98	39	237	433.402	430.449	0.888	53.367	406	426	167.005	44.519	1.19	0.841	0.957	0	255	489.344		1		44.287
																				18	3162			107.657	40.885	89	36	234	529.139	466.896	0.813	81.541	499	439	146.505	53.463	1.595	0.627	0.958	0	255	386.926		1		40.885
																				19	2334			152.242	54.62	230	58	244	1324.29	470.366	0.909	58.941	1297	481	14.744	53	1.09	0.917	0.969	0	255	459.545		1		54.62
																				20	1892			118.094	42.889	107	52	245	1212.64	474.209	0.826	63.325	1198	446	111.297	41.042	1.535	0.651	0.958	0	255	353.575		1		42.889
																				21	1868			109.497	38.092	86	45	245	908.093	474.553	0.843	56.356	899	501	62.526	45.043	1.165	0.858	0.956	0	255	139.957	1		38.092
																				22	4121			133.389	55.683	126	31	249	1123.76	494.225	0.865	84.202	1096	463	127.278	66.405	1.301	0.769	0.968	0	255	264.488	1		55.683
																				23	3740			119.349	53.981	104	37	248	855.715	512.99	0.88	74.148	818	515	10.098	66	1.057	0.946	0.969	0	255	104.895	1		53.981
																				24	1580			124.044	54.408	95	34	248	1179.49	506.374	0.876	50.695	1171	529	67.989	39	1.247	0.802	0.966	0	255	310.907	1		54.408
																				25	2355			117.345	50.531	74	43	242	455.877	516.861	0.76	76.655	418	510	172.504	39	1.942	0.515	0.954	0	255	442.127		1		50.531
																				26	2699			115.767	38.174	87	57	231	708.328	533.86	0.818	71.309	673	528	157.751	55.046	1.224	0.817	0.952	0	255	195.798	1		38.174
																				27	5638			136.943	62.273	75	35	251	1040.56	562.864	0.796	110.454	1038	617	84.806	66.601	1.686	0.593	0.97	0	255	161.118	1		62.273
																				28	3248			119.046	49.268	90	48	246	1309.01	544.237	0.883	71.386	1276	553	11.31	62.503	1.105	0.905	0.967	0	255	427.147		1		49.268
																				29	3471			136.279	57.762	118	35	250	1173.66	561.776	0.824	79.63	1149	596	54.713	63.333	1.163	0.86	0.967	0	255	290.771	1		57.762
																				30	2112			126.312	52.011	101	35	240	972.753	561.017	0.881	61.27	956	536	116.147	46.968	1.296	0.772	0.969	0	255	99.8987	1		52.011
																				31	2189			89.123	54.818	41	2	250	1449.96	560.677	0.876	61.294	1426	577	33.69	50.824	1.14	0.877	0.968	0	255	564.952		1		54.818
																				32	1171			129.173	47.87	140	28	248	1125.23	568.836	0.837	47.802	1122	592	74.219	31.757	1.474	0.678	0.957	0	255	241.862	1		47.87
																				33	3805			127.338	63.727	93	16	251	958.129	603.303	0.615	104.809	929	556	127.635	54.638	2.16	0.463	0.863	0	255	71.3577	1		63.727
																				34	1529			98.726	34.757	87	47	229	497.907	589.99	0.87	52.697	482	570	123.389	40.108	1.305	0.766	0.962	0	255	390.201		1		34.757
																				35	1334			116.932	44.788	106	41	241	1378.37	602.633	0.917	44.147	1377	625	76.908	41	1.049	0.953	0.966	0	255	491.053		1		44.788
																				36	3463			133.015	61.928	84	37	249	1176.45	621.425	0.835	84.404	1139	642	36.327	55.536	1.536	0.651	0.969	0	255	289.144	1		61.928
																				37	3357			100.394	54.94	118	13	250	1452.44	629.866	0.82	82.492	1452	671	83.737	50.666	1.656	0.604	0.971	0	255	565.262		1		54.94
																				38	4432			127.205	60.444	95	24	249	920.679	650.122	0.747	105.19	873	629	150.998	54.15	2.015	0.496	0.948	0	255	49.853	1		60.444
																				39	5581			133.482	56.94	118	32	248	729.434	655.748	0.805	106.738	676	653	164.792	69.128	1.566	0.639	0.969	0	255	163.683	1		56.94
																				40	2520			146.942	60.47	80	44	245	470.415	661.186	0.878	62.642	457	633	106.699	54	1.1	0.909	0.962	0	255	419.792		1		60.47
																				41	1971			141.848	57.959	118	40	249	1327.71	666.462	0.895	59.237	1300	679	21.801	43.167	1.319	0.758	0.971	0	255	443.517		1		57.959
																				42	4523			133.903	58.418	88	30	250	867.116	698.355	0.829	93.381	859	651	99.866	67.292	1.348	0.742	0.961	0	255	87.7624	1		58.418
																				43	3044			125.998	50.745	118	43	248	1086.44	685.307	0.884	69.857	1072	717	66.371	57.939	1.213	0.824	0.967	0	255	211.748	1		50.745
																				44	1769			129.568	50.581	96	48	248	1187.62	677.231	0.874	56.613	1183	705	72.525	43	1.258	0.795	0.962	0	255	306.992	1		50.581
																				45	2216			107.454	54.038	88	14	251	1403.79	698.181	0.896	59.228	1400	728	78.311	48	1.198	0.835	0.967	0	255	523.345		1		54.038
																				46	3600			149.324	56.69	230	30	244	589.791	716.99	0.756	94.557	544	704	162.14	52.111	1.861	0.537	0.948	0	255	315.29		1		56.69
																				47	2383			137.802	56.769	116	25	249	1347.6	722.822	0.844	68.942	1332	753	66.038	47.211	1.427	0.701	0.963	0	255	473.102		1		56.769
																				48	1909			145.41	57.799	101	47	249	1298.8	727.23	0.84	55.579	1298	699	98.276	49	1.111	0.9	0.94	0	255	426.946		1		57.799
																				49	1652			151.433	63.295	95	42	248	908.78	734.16	0.789	57.28	898	759	73.78	43.136	1.324	0.755	0.936	0	255	123.05	1		63.295
																				50	972			46.43	31.89	26	9	194	1435.07	732.857	0.846	44.654	1417	744	34.046	29.462	1.508	0.663	0.952	0	255	560.603		1		31.89
																				51	1869			157.715	52.212	100	63	244	770.864	755.62	0.85	60.605	745	737	142.374	43.134	1.397	0.716	0.958	0	255	184.214	1		52.212
																				52	2823			104.831	54.381	79	17	250	1393.27	768.968	0.845	71.868	1379	801	68.791	53.033	1.299	0.77	0.964	0	255	529.345		1		54.381
																				53	2200			113.193	48.16	72	51	249	1201.3	773.14	0.715	66.708	1180	748	130.135	50.744	1.346	0.743	0.911	0	255	352.37		1		48.16
																				54	2193			128.031	56.287	80	44	238	487.788	772.885	0.89	60.605	470	749	127.626	48.79	1.244	0.804	0.969	0	255	430.447		1		56.287
																				55	3589			141.25	56.937	92	37	247	728.484	792.348	0.721	101.607	699	751	126.193	47.489	2.214	0.452	0.957	0	255	239.663	1		56.937
																				56	3107			119.436	48.041	118	37	241	400.236	784.547	0.851	74.25	379	756	115.53	59.397	1.16	0.862	0.965	0	255	516.522		1		48.041
																				57	1994			100.882	46.016	82	26	249	1349.25	819.117	0.885	58.31	1335	845	59.036	46.444	1.242	0.805	0.961	0	255	505.74		1		46.016
																				58	4273			92.815	48.13	90	17	251	1308.7	880.479	0.868	87.321	1292	924	60.499	62.933	1.335	0.749	0.972	0	255	499.024		1		48.13
																				59	1073			105.113	53.109	69	41	243	1096.73	870.993	0.823	47.539	1075	865	157.751	30.64	1.596	0.627	0.945	0	255	332.236		1		53.109
																				60	1295			106.468	51.466	83	34	238	557.717	938.681	0.833	52.431	536	925	145.098	33.772	1.558	0.642	0.95	0	255	463.459		1		51.466
																				61	2279			109.722	53.078	76	31	245	943.764	948.335	0.877	64.195	914	937	161.847	45.872	1.379	0.725	0.968	0	255	340.058		1		53.078
																				62	2471			97.027	56.235	57	20	250	1169.97	981.425	0.887	61.984	1139	975	169.778	54.048	1.117	0.895	0.964	0	255	464.308		1		56.235
																				63	1195			91.571	46.133	61	17	244	754.752	991.718	0.865	49.336	732	986	162.3	34.606	1.417	0.706	0.959	0	255	401.309		1		46.133
																				64	1007			118.317	60.446	69	44	247	1016.32	997.406	0.86	44.777	997	986	150.573	30.423	1.516	0.659	0.946	0	255	405.46		1		60.446
																				65	1460			57.42	37.809	37	5	247	675.22	1006.89	0.672	66.4	645	990	142.958	31.82	2.256	0.443	0.918	0	255	447.441		1		37.809
																				66	1062			122.206	61.918	93	29	246	895.443	1003.06	0.866	43.566	878	989	148.134	32.655	1.347	0.742	0.945	0	255	390.168		1		61.918
																				67	1867			60.622	37.929	43	12	247	1127.11	1012.96	0.79	59.228	1101	1024	11.689	43.206	1.335	0.749	0.941	0	255	466.301		1		37.929
																				68	1255			98.4	50.203	49	9	243	716.567	1010.56	0.782	56.08	694	993	140.064	29.979	1.895	0.528	0.945	0	255	432.743		1		50.203
																				69	1681			79.585	39.012	62	16	230	769.327	1037.47	0.799	60.836	741	1024	154.699	37.127	1.739	0.575	0.949	0	255	440.618		1		39.012
																				70	1614			94.443	41.719	79	18	241	935.143	1043.98	0.798	60.44	906	1052	16.336	32.422	1.852	0.54	0.96	0	255	433.633		1		41.719
																				71	948			59.132	35.969	51	9	230	854.823	1057.69	0.776	49.649	833	1046	152.403	26.496	1.977	0.506	0.946	0	255	445.913		1		35.969
																																30.4359	0
																																23.4129	10
																																17.7308	20
																																14.1232	30
																																19.3619	40
																																15.7095	50
																																34.7432	60
																																22.1707	70
																																15.3346	80
																																25.8369	90
																																13.9053	100
																																20.88
																																29.162
																																19.915
																																23.8398
																																18.684
																																16.6185
																																25.3919
																																18.3542
																																19.7194
																																17.5493
																																26.2205	Bin	Frequency	% Freq
																																23.0897	0	0	0
																																15.7864	10	0	0
																																23.8704	20	40	56.338
																																22.2056	30	24	33.8028
																																34.3954	40	7	9.85915
																																22.2296	50	0	0
																																24.7968	60	0	0
																																19.0795	70	0	0
																																19.087	80	0	0
																																14.8855	90	0	0
																																32.6375	100	0	0
																																16.4098	More	0	0
																																13.7474
																																26.2834
																																25.688
																																32.7562
																																33.2382
																																19.5067
Bin	0	10	20	30	40	50																										18.4464
	0	1.66394	70.2977	25.0894	2.47279	0.31746																										29.0788
	0	1.81703	15.2236	14.3141	3.66856	0.777616																										21.7535
	6	6	6	6	6	6																										17.6293
	0	0.741799	6.215	5.84371	1.49768	0.31746																										18.4436
% frequency																																29.445
																																21.4685
	0	0	56.338	33.8028	9.85915	0																										17.3073
	0	1.0101	49.4949	48.4848	1.0101	0																										17.837
	0	0	75.7895	23.1579	1.05263	0																										13.9053
	0	1.1236	88.764	10.1124	0	0																										18.8724
	0	3.80952	68.5714	22.8571	1.90476	1.90476																										22.3797
	0	4.0404	82.8283	12.1212	1.0101	0																										20.7729
																																18.8724
																																31.6404
																																23.1214
																																18.1577
																																27.1918
																																14.8036
																																16.327
																																19.9903
																																19.3018
																																15.3632
																																13.9436
																																20.677
																																13.5665
																																18.4436
																																17.4633
																																18.9443
																																18.821
																																15.4607
[truncated: 153 more columns]

## Sheet: CNTF1w
																								pixel size	0.3114
		2.71909
			Overall Means																				C2	CNTF 1w 1927 1200um 20x A-E
Nerve area	Nerve diam	Cells/mm2	Cell#	Av Area	Tot Cell Area	Area frac	Mean	Stdev	Circ.	Feret	%Periph	CentrSD	PeriphSD	C/P Ratio		Nerve area	Nerve Feret (diam)	Centroid X	Centroid Y	Cell#	Area	Tot Area	Area frac	Mean	Stdev	Mode	Min	Max	XM	XY	Circ.	Feret	FeretX	FeretY	FeretAngle	MinFeret	AR	Round	Solidity	Min Thr	Max Thr	Centr dist	%Center	%Periph	CentrSD	PeriphSD		Nerve area	Nerve Feret (diam)
117556	445.035	1750.97	201.333	167.274	32886.9	0.287926	100.508	41.412	0.768458	18.6222	59.1726	41.2258	41.4208	0.997939		102054	425.014	263.234	229.783	149	197.247	29389.8	0.287983	102.257	44.8258	86.698	19.953	229.919			0.766765	20.0896										117.902	37.5839	62.4161	44.1163	45.2531		100585	400.999
28131.8	56.7603	481.295	45.5448	26.0519	3033.97	0.0582509	4.39432	5.94503	0.0038917	1.31796	13.0145	5.42706	6.39928	0.0268305							110.534			16.6106	8.96752	34.0256	9.22712	15.4463			0.104768	5.29798										47.4648			8.55576	9.22567
3	3	3	3	3	3	3	3	3	3	3	3	3	3	3						SEM	9.05534			1.36079	0.734648	2.78748	0.755915	1.26541			0.00858294	0.434027										3.88847			1.27789	0.990817
16241.9	32.7706	277.876	26.2953	15.041	1751.66	0.0336312	2.53706	3.43236	0.00224687	0.760924	7.51395	3.13332	3.69463	0.0154906
																1052431	1364.85	845.324	737.904	149	2034.11	303082		102.257	44.8258	86.698	19.953	229.919			0.766765	64.5138										378.619	37.5839	62.4161	44.1163	45.2531		1037278	1287.73
																					1139.88			16.6106	8.96752	34.0256	9.22712	15.4463			0.104768	17.0134										152.424			8.55576	9.22567
102054	425.014	1460.01	149	197.247	29389.8	0.287983	102.257	44.8258	0.766765	20.0896	62.4161	44.1163	45.2531	0.97488						SEM	93.3829			1.36079	0.734648	2.78748	0.755915	1.26541			0.00858294	1.39379										12.4871			1.27789	0.990817
100585	400.999	2306.51	232	150.074	34817.3	0.346148	95.5081	44.8629	0.772909	17.5392	70.2586	44.5959	44.976	0.991548
150029	509.093	1486.38	223	154.5	34453.5	0.229646	103.758	34.5473	0.7657	18.2377	44.843	34.9653	34.0332	1.02739						1	2154			108.894	40.194	110	28	235	845.596	300.336	0.565	83.774	830	342	66.801	36.8	2.424	0.412	0.85	0	255	437.568		1		40.194
																				2	3981			103.977	72.049	27	3	249	475.039	316.484	0.845	82	437	302	167.32	60.875	1.315	0.76	0.973	0	255	560.986		1		72.049
																				3	1177			118.025	52.774	83	22	241	553.714	312.971	0.884	44.911	532	316	11.56	36.062	1.147	0.872	0.957	0	255	515.368		1		52.774
																				4	772			65.145	42.287	26	5	208	428.798	326.295	0.595	48.508	431	300	104.323	24.179	2.003	0.499	0.869	0	255	585.59		1		42.287
																				5	7304			113.114	71.908	38	2	250	885.367	373.965	0.845	110.259	856	422	51.259	89.359	1.225	0.816	0.969	0	255	366.135		1		71.908
																				6	1306			130.52	49.569	116	18	250	381.019	344.614	0.823	51.088	363	364	49.764	34.821	1.425	0.702	0.946	0	255	608.487		1		49.569
																				7	2428			76.782	34.074	84	13	240	556.21	365.21	0.651	87.801	531	399	52.869	44.199	2.055	0.487	0.929	0	255	471.686		1		34.074
																				8	2481			113.719	66.007	51	7	247	1089.5	367.218	0.735	78.262	1082	329	100.305	46.901	1.783	0.561	0.922	0	255	443.882		1		66.007
																				9	1419			86.022	43.96	90	8	237	405.177	375.176	0.836	49.396	381	383	21.371	39.673	1.239	0.807	0.941	0	255	570.352		1		43.96
																				10	3234			74.403	35.145	64	9	209	689.793	396.691	0.857	78.39	679	359	113.295	54.51	1.458	0.686	0.972	0	255	374.988		1		35.145
																				11	2515			65.48	46.965	34	4	251	338.787	390.571	0.715	79.63	308	418	35.287	45.17	1.8	0.556	0.923	0	255	614.182		1		46.965
																				12	3115			77.742	47	39	5	230	1158.6	405.906	0.793	74.041	1141	440	73.523	57	1.295	0.772	0.955	0	255	456.472		1		47
																				13	1270			140.739	46.553	175	32	234	741.478	388.263	0.892	47.011	720	377	150.709	36.562	1.318	0.759	0.963	0	255	364.737		1		46.553
																				14	4957			89.141	57.044	59	5	248	985.866	414.575	0.864	87.658	957	447	55.222	74.223	1.17	0.855	0.964	0	255	352.553		1		57.044
																				15	1126			109.917	55.856	137	7	225	790.145	397.79	0.689	50.774	769	417	32.125	30.825	1.706	0.586	0.873	0	255	344.561		1		55.856
																				16	2659			84.553	40.532	93	12	241	379.687	417.504	0.704	86.47	336	428	5.974	41.54	2.053	0.487	0.949	0	255	565.22		1		40.532
																				17	1051			116.127	37.549	138	26	218	604.686	420.549	0.849	43.417	590	403	128.454	31.764	1.349	0.741	0.948	0	255	398.272		1		37.549
																				18	3342			118.595	54.702	98	9	248	811.305	443.043	0.821	85.235	774	424	157.949	54.214	1.561	0.641	0.969	0	255	296.817	1		54.702
																				19	2243			77.243	36.088	32	13	196	1232.75	442.983	0.829	58.523	1204	451	16.887	51.192	1.086	0.921	0.951	0	255	486.907		1		36.088
																				20	2254			96.151	49.459	76	21	233	565.831	452.588	0.816	64.257	554	423	110.973	47.376	1.348	0.742	0.943	0	255	399.401		1		49.459
																				21	712			75.188	43.705	44	15	225	935.687	452.653	0.818	39.395	919	443	156.038	26.334	1.526	0.655	0.939	0	255	299.222	1		43.705
																				22	1420			77.299	47.189	80	12	247	264.895	468.154	0.778	58.822	246	491	54.689	33.627	1.831	0.546	0.942	0	255	640.049		1		47.189
																				23	3315			89.542	51.07	28	15	244	691.298	476.273	0.786	81.988	664	444	120.005	59.192	1.295	0.772	0.947	0	255	303.603	1		51.07
																				24	2029			108.856	40.352	72	21	222	1151.76	488.501	0.769	65.215	1124	506	35.64	38.134	1.774	0.564	0.935	0	255	395.101		1		40.352
																				25	3616			119.952	43.835	152	17	218	804.572	523.365	0.796	91.924	760	510	165.51	54.721	1.677	0.596	0.967	0	255	218.375	1		43.835
																				26	1396			69.59	34.358	60	9	206	252.895	518.845	0.845	52.01	235	501	127.972	38.464	1.291	0.775	0.956	0	255	631.632		1		34.358
																				27	647			106.365	38.841	76	30	219	855.512	505.84	0.699	45.354	833	498	165.964	18.659	2.397	0.417	0.947	0	255	232.288	1		38.841
																				28	2809			73.358	32.242	92	11	209	312.705	534.257	0.77	81.437	295	574	65.323	46.807	1.715	0.583	0.963	0	255	570.224		1		32.242
																				29	1726			101.244	59.118	46	17	227	1079.4	547.098	0.52	83.385	1084	593	84.495	32.62	3.005	0.333	0.874	0	255	301.992	1		59.118
																				30	2043			103.213	51.357	56	15	236	995.324	538.739	0.695	68.242	960	524	145.146	45.83	1.524	0.656	0.897	0	255	249.333	1		51.357
																				31	1595			103.75	30.552	99	40	214	1179.4	542.136	0.87	53.451	1175	517	107.418	40	1.315	0.76	0.965	0	255	387.212		1		30.552
																				32	1535			90.02	35.653	62	19	215	1294.51	549.653	0.775	61.074	1273	529	129.685	34.59	1.756	0.569	0.954	0	255	487.037		1		35.653
																				33	4635			111.315	48.671	121	17	238	666.232	567.117	0.387	98.494	621	548	164.694	69.147	1.583	0.632	0.88	0	255	247.472	1		48.671
																				34	2300			79.625	49.704	92	8	242	242.476	569.811	0.675	71.063	234	532	103.841	43.614	1.543	0.648	0.885	0	255	625.844		1		49.704
																				35	1434			123.41	44.976	94	48	228	937.609	556.067	0.873	46.615	925	536	125.395	40.898	1.159	0.863	0.954	0	255	203.915	1		44.976
																				36	1402			103.886	63.995	42	10	241	1049.34	557.526	0.684	61.612	1030	534	125.754	37.227	1.713	0.584	0.903	0	255	272.323	1		63.995
																				37	1241			79.844	39.091	61	20	225	504.441	557.307	0.87	45.354	482	553	165.964	36.051	1.232	0.812	0.957	0	255	385.767		1		39.091
																				38	1449			109.258	39.451	100	23	216	1267.47	579.773	0.895	48.508	1243	577	165.677	41	1.171	0.854	0.966	0	255	450.793		1		39.451
																				39	1322			133.219	58.387	160	12	242	1029.95	588.405	0.879	47.854	1006	581	153.97	37.477	1.28	0.781	0.961	0	255	237.561	1		58.387
																				40	1790			97.175	48.973	67	13	245	558.269	603.189	0.867	53.852	547	579	111.801	43.62	1.214	0.824	0.955	0	255	317.094	1		48.973
																				41	3263			94.671	47.263	34	18	233	994.724	625.396	0.706	82.365	960	599	150.945	61.24	1.421	0.704	0.897	0	255	187.025	1		47.263
																				42	1983			107.726	39.739	115	26	243	1334.46	619.399	0.81	67.201	1316	592	126.529	43.841	1.533	0.652	0.955	0	255	503.292		1		39.739
																				43	1764			82.598	45.781	46	15	234	505.808	623.344	0.769	65.307	497	655	78.518	36.875	1.752	0.571	0.957	0	255	358.323		1		45.781
																				44	1631			84.274	29.286	72	13	188	301.496	613.82	0.879	52.498	284	633	49.635	40.733	1.24	0.807	0.966	0	255	557.804		1		29.286
																				45	1173			88.655	38.256	68	27	204	1111.32	613.378	0.762	49.82	1089	598	141.52	32.39	1.605	0.623	0.938	0	255	293.703	1		38.256
																				46	1408			105.006	28.022	118	34	219	1248.97	617.388	0.869	51.624	1228	602	148.465	36.844	1.387	0.721	0.961	0	255	421.256		1		28.022
																				47	1320			92.157	37.378	83	16	227	473.036	633.184	0.67	62.61	455	658	63.435	32.834	2.068	0.483	0.923	0	255	386.736		1		37.378
																				48	1034			95.545	35.653	87	29	231	641.814	629.313	0.748	49.729	634	605	105.154	32.299	1.53	0.653	0.912	0	255	230.669	1		35.653
																				49	699			68.717	39.73	24	13	232	257.682	623.371	0.76	41.231	247	640	50.906	22.749	1.923	0.52	0.933	0	255	598.699		1		39.73
																				50	816			102.744	48.281	54	25	221	807.681	628.999	0.83	41.049	800	611	124.077	29.717	1.362	0.734	0.949	0	255	115.227	1		48.281
																				51	2003			77.477	43.979	60	14	230	363.793	638.772	0.788	66.03	333	653	35.134	43.19	1.568	0.638	0.953	0	255	491.629		1		43.979
																				52	1328			102.398	34.505	100	28	206	736.774	639.468	0.61	65.49	706	641	172.983	28	2.507	0.399	0.897	0	255	146.536	1		34.505
																				53	1744			98.203	45.201	74	29	241	1388.07	651.259	0.776	66.708	1362	629	139.865	36.685	1.813	0.552	0.961	0	255	549.62		1		45.201
																				54	485			80.235	50.542	50	26	233	617.461	643.865	0.726	36.688	611	628	107.447	18.678	2.096	0.477	0.943	0	255	246.505	1		50.542
																				55	3400			95.314	43.801	100	14	232	594.391	676.534	0.71	91.263	573	636	124.735	46.868	1.871	0.535	0.949	0	255	258.329	1		43.801
																				56	882			102.102	42.975	85	20	237	1433.08	668.864	0.483	65.368	1416	637	119.31	21.035	3.787	0.264	0.855	0	255	591.797		1		42.975
																				57	2137			121.246	57.793	103	25	245	518.222	683.22	0.614	85	497	720	61.928	35.659	2.5	0.4	0.92	0	255	331.641	1		57.793
																				58	3503			106.475	59.582	55	9	247	872.226	677.36	0.823	77.201	850	644	126.573	59.625	1.257	0.796	0.959	0	255	66.2517	1		59.582
																				59	2015			81.866	46.723	64	17	234	290.939	667.033	0.811	64.031	258	662	165.53	41.191	1.54	0.649	0.951	0	255	558.897		1		46.723
																				60	2255			103.304	42.597	93	33	224	712.773	677.082	0.532	85.475	678	662	151.336	44.631	2.099	0.476	0.823	0	255	145.839	1		42.597
																				61	2472			111.568	45.296	77	29	220	1155.57	684.182	0.822	71.281	1127	663	145.864	47.868	1.509	0.663	0.958	0	255	314.863	1		45.296
																				62	582			67.541	34.064	42	20	182	768.739	674.239	0.777	36.674	750	669	154.134	24	1.502	0.666	0.931	0	255	99.5916	1		34.064
																				63	777			129.821	48.379	125	46	246	1220.23	685.132	0.795	42.638	1210	668	129.289	26.87	1.664	0.601	0.945	0	255	378.603		1		48.379
																				64	907			90.418	35.755	97	18	198	484.802	704.471	0.665	54.424	476	730	69.567	21.318	2.637	0.379	0.948	0	255	362.069		1		35.755
																				65	2376			98.561	53.686	41	15	246	437.796	701.325	0.711	77.473	402	720	23.587	38.977	2.08	0.481	0.94	0	255	409.166		1		53.686
																				66	1303			120.906	41.99	125	26	223	551.637	707.837	0.832	47.854	547	682	100.84	38.267	1.212	0.825	0.945	0	255	295.222	1		41.99
																				67	1968			122.596	47.544	129	20	243	1020.19	704.737	0.576	83.259	978	688	155.898	35.426	2.698	0.371	0.893	0	255	177.98	1		47.544
																				68	2887			117.412	46.927	133	16	239	1281.88	717.921	0.829	70.178	1252	696	139.044	55.85	1.245	0.803	0.959	0	255	437.01		1		46.927
																				69	1958			120.485	39.773	126	20	232	290.865	718.765	0.771	70.178	271	691	122.784	38.557	1.804	0.554	0.947	0	255	554.789		1		39.773
																				70	1457			81.215	39.614	52	30	226	366.229	713.465	0.777	59.481	338	723	16.607	32.064	1.91	0.524	0.956	0	255	479.718		1		39.614
																				71	770			91.236	44.026	39	23	193	661.904	721.064	0.521	55	638	708	143.13	25.879	2.086	0.479	0.811	0	255	184.191	1		44.026
																				72	1063			94.797	34.019	93	25	219	826.162	724.081	0.84	46.174	804	719	162.35	33.1	1.442	0.693	0.945	0	255	23.6275	1		34.019
																				73	2819			97.286	56.925	105	4	247	1197.1	737.447	0.842	68.066	1165	726	169.846	55.707	1.169	0.855	0.957	0	255	351.772		1		56.925
																				74	1803			97.27	43.399	94	9	224	628.539	738.466	0.825	55.543	604	726	156.666	44.257	1.238	0.808	0.952	0	255	216.786	1		43.399
																				75	1485			129.249	49.345	121	26	243	444.073	737.406	0.845	50.804	419	738	10.204	39.987	1.252	0.799	0.95	0	255	401.251		1		49.345
																				76	2689			100.698	45.175	106	19	243	1462.07	765.866	0.698	87.281	1457	723	94.6	41.541	2.171	0.461	0.944	0	255	617.38		1		45.175
																				77	2122			84.701	38.693	55	24	216	730.689	754.324	0.735	75.472	698	735	147.995	39.279	1.983	0.504	0.956	0	255	115.805	1		38.693
																				78	2597			107.967	37.573	92	20	240	992.105	774.295	0.703	86.77	970	736	117.451	47.515	1.803	0.555	0.935	0	255	151.225	1		37.573
																				79	3210			108.329	54.277	96	16	246	1329.6	770.393	0.851	71.218	1301	792	38.157	59.327	1.1	0.909	0.964	0	255	485.36		1		54.277
																				80	4159			88.205	50.416	63	8	251	927.196	773.567	0.839	89.051	886	754	155.45	62.169	1.441	0.694	0.967	0	255	89.3021	1		50.416
																				81	600			122.247	40.618	108	32	232	838.065	752.657	0.835	37.216	823	742	149.3	23	1.635	0.612	0.948	0	255	16.4421	1		40.618
																				82	1916			103.425	35.589	117	28	217	373.197	764.308	0.877	57.489	344	759	166.931	45	1.287	0.777	0.967	0	255	472.865		1		35.589
																				83	8367			106.155	46.816	103	15	238	1079.24	799.604	0.482	123.649	1017	820	18.875	100.085	1.354	0.739	0.889	0	255	241.916	1		46.816
																				84	5416			95.356	54.924	62	4	248	1235.99	785.439	0.263	111.879	1180	781	7.189	78.999	1.604	0.623	0.791	0	255	393.545		1		54.924
																				85	1369			120.006	36.022	105	32	226	473.717	771.134	0.837	52	448	779	22.62	36.062	1.397	0.716	0.956	0	255	373.09		1		36.022
																				86	1790			104.059	41.121	95	27	233	800.746	772.804	0.815	63.514	773	755	146.56	37.815	1.744	0.574	0.956	0	255	56.6146	1		41.121
																				87	1430			135.159	50.175	190	20	209	670.191	782.462	0.787	56.303	644	771	146.592	33.457	1.743	0.574	0.945	0	255	180.712	1		50.175
																				88	1516			75.046	37.838	46	18	207	309.484	784.799	0.877	51.478	287	772	150.945	40.289	1.202	0.832	0.965	0	255	537.888		1		37.838
																				89	3559			124.673	46.999	111	22	236	513.37	802.165	0.726	90.604	479	833	37.376	56.524	1.497	0.668	0.928	0	255	338.117	1		46.999
																				90	1835			119.334	58.702	112	22	245	1376.4	797.556	0.898	52.479	1364	774	120.964	46.908	1.109	0.901	0.965	0	255	534.415		1		58.702
																				91	1890			102.41	28.288	100	30	220	773.201	802.768	0.752	70.711	741	786	151.26	38.184	1.855	0.539	0.946	0	255	97.0003	1		28.288
																				92	2223			121.094	45.968	108	12	247	567.881	805.611	0.703	73.43	538	832	29.358	45.9	1.644	0.608	0.935	0	255	285.585	1		45.968
																				93	2001			102.408	34.869	93	23	220	867.826	811.71	0.877	58.138	848	791	139.185	45.454	1.313	0.761	0.966	0	255	77.16	1		34.869
																				94	1183			116.497	36.162	113	30	230	462.834	807.254	0.793	45.804	440	796	143.881	35.968	1.33	0.752	0.935	0	255	388.726		1		36.162
																				95	3204			116.017	56.245	86	22	240	649.004	824.079	0.784	82.565	608	836	11.174	55	1.499	0.667	0.944	0	255	214.401	1		56.245
																				96	1648			114.637	43.51	116	19	230	1318.94	815.406	0.678	70.342	1286	807	165.174	33.772	2.236	0.447	0.916	0	255	479.917		1		43.51
																				97	1189			96.736	40.541	70	16	234	1473.83	825.532	0.746	56.08	1461	850	68.009	32.7	1.797	0.556	0.937	0	255	634.58		1		40.541
																				98	904			90.394	36.65	54	34	219	1409.27	827.746	0.883	37.696	1403	845	68.199	32.434	1.146	0.873	0.949	0	255	571.06		1		36.65
																				99	2158			127.297	45.897	100	11	249	1251.94	838.323	0.761	67.72	1221	854	16.294	49.393	1.285	0.778	0.92	0	255	418.83		1		45.897
																				100	3227			111.245	53.556	89	5	243	336.441	845.969	0.841	78.237	304	821	144.888	55.879	1.415	0.707	0.963	0	255	520.231		1		53.556
																				101	1052			126.911	42.784	155	20	226	922.544	834.617	0.705	52.773	899	831	170.181	26	2.163	0.462	0.954	0	255	123.759	1		42.784
																				102	1665			129.755	47.732	150	31	240	458.982	843.268	0.633	73.437	428	838	173.746	33.287	2.359	0.424	0.944	0	255	400.452		1		47.732
																				103	3501			88.713	50.292	75	12	245	553.898	865.1	0.692	99.825	499	853	169.028	55	1.639	0.61	0.919	0	255	317.975	1		50.292
																				104	2266			102.96	44.074	102	21	228	761.599	866.361	0.711	77.621	724	857	165.069	36.639	2.194	0.456	0.935	0	255	153.333	1		44.074
																				105	2374			102.405	48.781	69	21	245	1295.12	870.321	0.827	65.299	1268	856	152.65	50	1.21	0.827	0.946	0	255	468.886		1		48.781
																				106	1516			104.698	44.642	113	16	223	1339.48	882.155	0.689	54.562	1322	856	116.095	41.593	1.307	0.765	0.87	0	255	514.78		1		44.642
																				107	2053			91.276	45.19	59	17	237	497.989	880.571	0.779	67.72	469	872	163.706	42	1.544	0.647	0.959	0	255	375.494		1		45.19
																				108	1264			96.136	39.888	74	14	218	449.471	879.406	0.86	47.424	444	903	65.056	37.746	1.155	0.866	0.951	0	255	420.384		1		39.888
																				109	3008			118.978	53.753	102	15	250	1444.62	904.542	0.704	91.241	1420	944	62.592	42.506	2.195	0.456	0.946	0	255	622.027		1		53.753
																				110	1958			106.798	40.644	120	17	221	401.949	901.013	0.858	57.489	394	929	76.931	44.917	1.23	0.813	0.961	0	255	472.426		1		40.644
																				111	523			82.067	22.385	78	46	188	693.71	883.402	0.779	36.674	676	885	11.004	19	1.898	0.527	0.948	0	255	210.134	1		22.385
																				112	2671			106.909	55.012	47	14	237	599.578	915.562	0.776	76.118	563	915	170.166	49.283	1.49	0.671	0.947	0	255	303.238	1		55.012
																				113	1814			103.652	39.109	109	13	239	844.864	910.875	0.679	66.37	814	913	173.946	40.551	1.869	0.535	0.89	0	255	172.972	1		39.109
																				114	1384			138.947	50.04	143	31	237	1402.81	914.869	0.698	61.555	1379	935	46.975	33.81	1.808	0.553	0.936	0	255	584.896		1		50.04
																				115	2402			93.178	47.328	96	10	229	1182.5	918.648	0.768	73.246	1147	911	165.774	50.912	1.416	0.706	0.93	0	255	382.569		1		47.328
																				116	3063			103.723	43.196	83	26	236	970.907	935.579	0.834	73.6	940	915	143.286	56.496	1.294	0.773	0.947	0	255	234.193	1		43.196
																				117	1066			89.471	35.66	58	27	239	898.436	928.173	0.83	45.453	878	940	39.644	32.707	1.408	0.71	0.948	0	255	197.543	1		35.66
																				118	1544			98.484	43.954	131	8	206	536.03	928.963	0.864	49.679	517	913	130.101	40	1.231	0.813	0.968	0	255	363.547		1		43.954
																				119	1794			87.847	46.431	89	17	245	443.795	935.066	0.897	54.818	417	942	14.797	45	1.186	0.843	0.963	0	255	447.324		1		46.431
																				120	1874			115.613	25.239	116	35	212	1315.36	934.221	0.733	69.721	1281	928	171.754	32.753	2.184	0.458	0.955	0	255	509.381		1		25.239
																				121	3653			97.286	50.105	47	14	236	675.558	955.851	0.742	94.847	632	941	155.056	53.548	1.785	0.56	0.954	0	255	276.263	1		50.105
																				122	1835			90.265	39.756	110	16	218	1372.59	957.938	0.824	60.208	1355	933	122.106	45	1.25	0.8	0.956	0	255	571.337		1		39.756
																				123	1270			111.067	41.083	111	31	227	731.883	961.715	0.653	59.666	706	938	140.44	36.375	1.689	0.592	0.893	0	255	250.919	1		41.083
																				124	1917			91.479	49.793	34	14	247	1415.37	975.122	0.803	61.855	1400	1004	55.539	41.736	1.537	0.651	0.943	0	255	617.432		1		49.793
																				125	1946			85.581	39.783	63	20	230	495.118	974.72	0.775	63.906	466	987	20.136	39.665	1.696	0.59	0.95	0	255	422.76		1		39.783
																				126	1797			93.996	40.821	74	19	204	617.834	987.267	0.862	56.321	590	982	163.496	42.408	1.301	0.768	0.956	0	255	337.541	1		40.821
																				127	2183			108.628	31.885	97	32	208	1086.07	1005.96	0.712	76.007	1054	985	147.355	41.489	1.903	0.526	0.925	0	255	360.293		1		31.885
																				128	1666			94.151	34.252	91	24	203	691.923	1005.18	0.715	70.456	664	986	145.408	34.362	2.154	0.464	0.946	0	255	308.167	1		34.252
																				129	1216			90.481	42.221	58	27	229	1351.49	1002.48	0.845	44.911	1330	1006	11.56	35.689	1.227	0.815	0.933	0	255	571.146		1		42.221
																				130	1317			123.188	37.74	97	40	221	1007.33	1005.63	0.868	46.098	991	989	130.601	36.598	1.172	0.853	0.961	0	255	312.929	1		37.74
																				131	1203			102.293	28.237	124	32	210	958.871	1004.62	0.673	57.306	933	993	150.751	30.726	1.938	0.516	0.903	0	255	289.876	1		28.237
																				132	2561			120.363	47.623	142	32	229	1215.67	1062.48	0.807	68.007	1201	1095	72.897	54.737	1.203	0.832	0.942	0	255	492.45		1		47.623
																				133	1663			120.402	54.108	70	31	232	1121.67	1060.79	0.885	51.614	1109	1038	125.538	41.03	1.231	0.812	0.965	0	255	424.999		1		54.108
																				134	1146			109.391	48.44	66	28	236	515.341	1052.3	0.772	51.264	492	1042	159.444	27.992	1.852	0.54	0.937	0	255	455.777		1		48.44
																				135	2062			109.971	58.583	73	20	237	952.001	1069.92	0.739	70.292	929	1046	129.806	40.489	1.79	0.559	0.942	0	255	348.731		1		58.583
																				136	2812			106.003	38.391	108	24	222	648.823	1064.25	0.654	91.788	604	1061	172.488	43.759	2.355	0.425	0.903	0	255	380.94		1		38.391
																				137	2448			108.902	31.742	94	37	212	853.489	1074.86	0.87	66.31	822	1064	156.915	48.613	1.397	0.716	0.964	0	255	337.052	1		31.742
																				138	830			135.627	60.852	205	24	244	918.763	1071.6	0.715	43.829	914	1051	117.15	25.201	1.749	0.572	0.909	0	255	341.683		1		60.852
																				139	3146			105.903	49.386	73	5	238	1292.46	1100.14	0.8	78.294	1259	1120	28.202	54.615	1.405	0.712	0.946	0	255	575.454		1		49.386
																				140	945			83.197	34.496	79	21	232	903.968	1104.87	0.862	44.011	898	1084	111.318	29	1.472	0.679	0.962	0	255	371.619		1		34.496
																				141	2128			122.562	61.902	71	14	250	941.281	1121.6	0.788	63.246	927	1093	108.435	47.982	1.325	0.755	0.936	0	255	395.514		1		61.902
																				142	2279			120.076	65.971	90	25	244	1199.72	1134.62	0.871	63.514	1174	1155	33.44	48.79	1.306	0.766	0.963	0	255	531.958		1		65.971
																				143	1541			116.696	45.621	72	23	241	1089.95	1137.32	0.862	52.612	1065	1130	171.254	39.682	1.291	0.775	0.96	0	255	468.373		1		45.621
																				144	1938			107.91	40.036	72	24	239	977.303	1158.98	0.67	70.711	970	1121	118.74	39.905	1.828	0.547	0.891	0	255	441.274		1		40.036
																				145	2611			105.161	48.427	113	19	231	1132.25	1169.19	0.874	63.246	1102	1160	161.565	57.012	1.07	0.935	0.964	0	255	518.005		1		48.427
																				146	1798			125.003	58.666	127	16	251	1053.57	1175.19	0.829	53.31	1042	1148	113.199	46.36	1.15	0.869	0.948	0	255	484.337		1		58.666
																				147	911			100.064	49.717	43	23	252	1000.57	1208.63	0.814	44.777	982	1196	150.573	27.32	1.639	0.61	0.95	0	255	495.66		1		49.717
																				148	2090			97.157	50.026	46	14	241	1061.91	1216.26	0.721	70.214	1024	1212	169.33	41.73	1.792	0.558	0.918	0	255	525.101		1		50.026
																				149	502			87.386	37.565	51	25	183	1109.16	1211	0.923	29.411	1097	1219	35.311	23.335	1.216	0.822	0.955	0	255	541.69		1		37.565
																																26.0872	0
																																25.5348	10
																																13.9853	20
																																15.1054	30
																																34.3347	40
																																15.9088	50
																																27.3412	60
																																24.3708	70
																																15.3819	80
																																24.4106	90
																																24.7968	100
																																23.0564
																																14.6392
																																27.2967
																																15.811
																																26.9268
																																13.5201
																																26.5422
																																18.2241
																																20.0096
																																12.2676
																																18.3172	Bin	Frequency	% Freq
																																25.5311	0	0	0
																																20.308	10	1	0.671141
																																28.6251	20	76	51.0067
																																16.1959	30	67	44.9664
																																14.1232	40	5	3.3557
																																25.3595	50	0	0
																																25.9661	60	0	0
																																21.2506	70	0	0
																																16.6446	80	0	0
																																19.0184	90	0	0
																																30.671	100	0	0
																																22.129	More	0	0
																																14.5159
																																19.186
																																14.1232
																																15.1054
																																14.9017
																																16.7695
Bin	0	10	20	30	40	50																										25.6485
	0	2.41948	62.527	33.2108	1.69908	0.143678																										20.9264
	0	1.52198	10.4974	10.9593	1.49555	0.248858																										20.3366
	3	3	3	3	3	3																										16.3479
	0	0.878715	6.06066	6.32736	0.863457	0.143678																										15.5139
% frequency																																16.0757
	0	0.671141	51.0067	44.9664	3.3557	0																										19.4968
	0	3.44828	71.5517	23.2759	1.2931	0.431034																										15.4856
	0	3.13901	65.0224	31.3901	0.44843	0																										12.8393
																																12.7827
																																20.5617
																																20.3936
																																20.7729
																																11.4246
																																28.4193
																																20.3556
																																26.469
																																24.0404
																																19.9393
																																26.6169
																																22.1969
																																11.4203
																																13.2775
																																16.9476
																																24.1251
																																14.9017
																																25.9269
																																21.8534
																																21.8534
																																18.5224
																																17.127
																																14.3786
																																21.1958
																																17.2961
																																15.8204
																																27.1793
																																23.502
																																27.0202
																																22.1773
																																27.7305
																																11.5891
																																17.9021
																																38.5043
																																34.8391
																																16.1928
																																19.7783
																																17.5328
																																16.0302
																																28.2141
																																16.342
																																22.0194
																																22.8661
																																18.1042
																																14.2634
																																25.7107
																																21.9045
																																17.4633
																																11.7385
																																21.088
																																24.363
																																16.4335
																																22.8683
																																31.0855
																																24.1712
																																20.3341
																																16.9906
																																21.088
																																14.7678
																																28.4124
																																17.9021
																																11.4203
																																23.7031
																																20.6676
																																19.1682
																																22.8088
																																22.919
																																14.1541
																																15.47
																																17.0703
																																21.7111
																																29.5354
																																18.7488
																																18.58
																																19.2616
																																19.9003
																																17.5384
																																23.6686
																																21.94
																																13.9853
																																14.3549
																																17.8451
																																21.1774
																																16.0726
																																15.9636
																																21.8889
																																28.5828
																																20.6489
																																13.6484
																																24.3808
																																13.705
																																19.6948
																																19.7783
																																16.3834
																																22.0194
																																19.6948
																																16.6007
																																13.9436
																																21.8646
																																9.15859
[truncated: 60 more columns]

## Sheet: FGF21w
		2.46994
			Overall Means																				B4	FGF2 1w 1957 1000u 20x A-B
Nerve area	Nerve diam	Cells/mm2	Cell#	Av Area	Tot Cell Area	Area frac	Mean	Stdev	Circ.	Feret	%Periph	CentrSD	PeriphSD	C/P Ratio		Nerve area	Nerve Feret (diam)	Centroid X	Centroid Y	Cell#	Area	Tot Area	Area frac	Mean	Stdev	Mode	Min	Max	XM	XY	Circ.	Feret	FeretX	FeretY	FeretAngle	MinFeret	AR	Round	Solidity	Min Thr	Max Thr	Centr dist	%Center	%Periph	CentrSD	PeriphSD		Nerve area	Nerve Feret (diam)
102640	386.665	1590.53	156.333	130.098	20112.8	0.207172	105.801	42.4986	0.723401	16.7951	64.1528	43.9901	41.6126	1.05391		103105	391.036	225.26	216.09	148	144.595	21400.1	0.207557	102.794	44.2526	101.101	20.3851	237.858			0.731128	17.7162										108.072	35.8108	64.1892	45.1778	43.7365		65261	317.914
37149.4	66.6724	308.706	34.2685	14.5767	3131.98	0.0465003	9.64421	7.9347	0.0442473	0.803212	2.79464	8.92412	7.29746	0.0378745							67.9035			22.7055	12.3774	61.5994	14.5628	21.7184			0.107275	4.15016										40.0551			10.8097	13.1979
3	3	3	3	3	3	3	3	3	3	3	3	3	3	3						SEM	5.58163			1.86638	1.01741	5.06344	1.19705	1.78524			0.00881799	0.341141										3.29251			1.62497	1.31258
21448.2	38.4934	178.232	19.785	8.41584	1808.25	0.026847	5.56809	4.5811	0.0255462	0.463735	1.61349	5.15234	4.21319	0.0218668
																1063267	1255.74	723.377	693.932	148	1491.14	220688		102.794	44.2526	101.101	20.3851	237.858			0.731128	56.892										347.052	35.8108	64.1892	45.1778	43.7365		673002	1020.92
																					700.253			22.7055	12.3774	61.5994	14.5628	21.7184			0.107275	13.3274										128.629			10.8097	13.1979
103105	391.036	1435.43	148	144.595	21400.1	0.207557	102.794	44.2526	0.731128	17.7162	64.1892	45.1778	43.7365	1.03296						SEM	57.5605			1.86638	1.01741	5.06344	1.19705	1.78524			0.00881799	1.09551										10.5732			1.62497	1.31258
65261	317.914	1946.03	127	130.254	16542.3	0.253479	98.0176	33.8336	0.763276	16.4292	66.9291	34.5315	33.4888	1.03114
139555	451.044	1390.13	194	115.443	22396	0.160481	116.59	49.4095	0.675799	16.2401	61.3402	52.2608	47.6125	1.09763						1	1299			71.905	33.889	46	19	224	891.52	239.977	0.725	58.241	867	229	164.055	33.527	1.767	0.566	0.948	0	255	484.094		1		33.889
																				2	569			93.121	43.068	98	16	233	705.491	239.976	0.8	33.971	694	229	137.386	24.243	1.454	0.688	0.925	0	255	454.308		1		43.068
																				3	1544			96.031	34.423	95	18	249	780.813	247.244	0.636	56.604	753	259	32.005	41.967	1.318	0.759	0.9	0	255	450.365		1		34.423
																				4	914			79.744	44.092	93	8	233	628.359	248.252	0.575	57.315	596	249	6.009	24.897	2.342	0.427	0.879	0	255	455.696		1		44.092
																				5	1169			91.077	54.698	23	18	235	690.147	258.129	0.626	59.414	662	249	173.234	30.091	2.218	0.451	0.859	0	255	437.068		1		54.698
																				6	1174			75.845	38.426	58	6	208	858.634	260.372	0.718	58.83	837	243	148.201	29.099	1.988	0.503	0.944	0	255	454.168		1		38.426
																				7	1305			108.456	56.169	255	13	255	578.169	263.764	0.767	56.462	555	251	157.068	32	1.695	0.59	0.944	0	255	454.015		1		56.169
																				8	1892			54.896	40.81	22	6	246	541.141	280.183	0.636	74.324	513	270	156.194	43.547	1.78	0.562	0.898	0	255	452.104		1		40.81
																				9	949			72.759	40.267	23	12	222	657.606	277.764	0.628	54.083	629	279	3.18	26.519	2.186	0.458	0.871	0	255	421.333		1		40.267
																				10	1781			67.759	47.849	59	7	255	437.678	290.668	0.814	59.942	428	319	62.152	42	1.363	0.734	0.968	0	255	494.212		1		47.849
																				11	829			77.268	38.087	71	6	230	469.188	281.039	0.755	45.177	460	303	62.301	27	1.807	0.553	0.963	0	255	484.864		1		38.087
																				12	867			90.08	57.646	11	1	255	749.891	287.658	0.791	41.773	728	286	11.041	29.593	1.416	0.706	0.935	0	255	407.138		1		57.646
																				13	1320			62.034	37.941	7	5	222	857.627	298.861	0.835	50.961	833	294	164.055	33.997	1.484	0.674	0.96	0	255	417.258		1		37.941
																				14	1034			152.45	71.376	255	3	255	794.148	304.521	0.765	46.141	769	297	150.101	34.581	1.369	0.73	0.934	0	255	395.79		1		71.376
																				15	1864			113.322	56.335	106	7	255	725.519	318.125	0.601	71.218	708	295	128.157	43.847	1.857	0.539	0.849	0	255	375.813		1		56.335
																				16	2249			96.026	57.452	76	2	255	393.657	321.606	0.774	68.884	362	339	39.699	44.548	1.622	0.617	0.948	0	255	497.335		1		57.452
																				17	782			61.015	31.93	52	1	198	902.659	310.269	0.873	37.577	885	318	25.201	27.595	1.283	0.78	0.946	0	255	423.485		1		31.93
																				18	874			93.637	52.384	70	4	228	773.841	321.912	0.775	44.204	764	301	127.648	29.291	1.556	0.643	0.939	0	255	375.427		1		52.384
																				19	2045			110.166	47.66	83	14	244	476.2	326.157	0.763	67.268	457	356	41.987	42.821	1.608	0.622	0.93	0	255	443.12		1		47.66
																				20	1659			65.265	33.074	29	11	230	946.767	329.643	0.894	52.802	933	307	114.624	43	1.185	0.844	0.972	0	255	427.328		1		33.074
																				21	1322			77.722	56.666	57	10	255	679.787	346.78	0.67	59.641	660	329	145.244	34.648	1.956	0.511	0.891	0	255	349.878		1		56.666
																				22	900			89.02	54.424	90	6	251	708.611	341.191	0.617	53	685	324	148.109	27.363	2.162	0.462	0.865	0	255	353.05		1		54.424
																				23	921			124.68	51.523	255	9	255	286.731	346.162	0.682	52.01	268	366	37.972	25.338	2.245	0.445	0.917	0	255	558.215		1		51.523
																				24	1355			127.063	64.675	255	7	255	434.814	355.5	0.826	49.98	429	380	70.115	37.818	1.309	0.764	0.949	0	255	444.753		1		64.675
																				25	1688			84.621	39.01	84	15	234	625.819	354.621	0.897	52.887	601	363	15.35	42	1.208	0.828	0.969	0	255	353.057		1		39.01
																				26	1381			115.99	79.45	255	2	255	775.603	357.349	0.899	46.84	753	363	16.113	39.72	1.14	0.877	0.964	0	255	340.611		1		79.45
																				27	1258			66.553	25.661	41	11	171	1090.19	365.367	0.71	61.4	1073	339	127.057	30.43	1.986	0.504	0.957	0	255	492.453		1		25.661
																				28	1736			72.712	52.065	47	0	255	382.521	364.052	0.589	77.936	348	384	33.486	33.498	2.574	0.388	0.879	0	255	474.345		1		52.065
																				29	2258			50.137	41.954	6	0	186	326.205	363.216	0.789	68.447	291	367	11.802	46	1.512	0.661	0.967	0	255	516.835		1		41.954
																				30	1864			60.908	43.077	31	3	233	736.46	384.42	0.834	58.31	728	411	84.094	46	1.194	0.837	0.952	0	255	309.788	1		43.077
																				31	1347			147.911	94.806	255	18	255	561.735	379.651	0.902	45.607	540	387	15.255	39.334	1.134	0.882	0.964	0	255	353.413		1		94.806
																				32	2834			83.471	46.8	40	11	255	913.918	393.764	0.716	83.648	876	414	27.79	49.234	1.69	0.592	0.913	0	255	355.537		1		46.8
																				33	1638			92.791	51.51	61	2	255	269.042	389.567	0.859	55.543	244	401	23.334	38	1.365	0.733	0.968	0	255	546.862		1		51.51
																				34	2167			128.969	60.786	255	15	255	519.254	406.584	0.787	62.769	508	436	67.521	49.66	1.221	0.819	0.93	0	255	352.47		1		60.786
																				35	937			86.759	36.962	75	22	218	626.148	392.955	0.861	41.629	608	383	155.898	30	1.361	0.735	0.955	0	255	316.292		1		36.962
																				36	857			81.315	46.167	52	6	241	314.176	394.466	0.698	46.819	294	404	19.983	24.009	1.823	0.548	0.939	0	255	507.075		1		46.167
																				37	885			83.368	37.313	92	5	241	362.437	396.899	0.607	55.027	337	400	19.093	24.076	2.367	0.422	0.87	0	255	467.447		1		37.313
																				38	888			96.168	33.21	71	25	214	957.221	412.858	0.877	37.855	952	395	102.2	31.626	1.211	0.826	0.955	0	255	365.63		1		33.21
																				39	1153			109.395	42.623	94	26	247	1011.99	419.285	0.436	74.33	988	395	123.476	30.429	2.519	0.397	0.759	0	255	398.406		1		42.623
																				40	1286			96.177	36.834	101	15	234	230.207	424.418	0.699	58.694	210	451	44.31	33.213	1.819	0.55	0.939	0	255	562.009		1		36.834
																				41	1343			144.998	38.742	171	40	245	552.591	422.763	0.682	62.626	528	445	38.517	31.86	1.986	0.503	0.921	0	255	320.469		1		38.742
																				42	3245			99.243	49.599	64	18	255	470.53	438.427	0.789	76.322	462	477	68.477	59.885	1.206	0.829	0.938	0	255	359.464		1		49.599
																				43	2069			103.84	69.846	4	3	255	284.836	425.537	0.646	80.006	249	434	18.208	39.224	1.982	0.504	0.923	0	255	514.154		1		69.846
																				44	1633			117.492	54.1	76	13	249	829.109	440.112	0.586	67.082	818	409	116.565	36.54	2.047	0.488	0.848	0	255	274.962	1		54.1
																				45	705			91.359	49.539	90	13	237	711.744	433.872	0.666	46.325	700	451	57.339	24.749	2.108	0.474	0.894	0	255	260.32	1		49.539
																				46	2128			88.17	47.79	113	8	255	239.999	464.397	0.844	62.769	214	482	30.651	49.679	1.269	0.788	0.956	0	255	535.108		1		47.79
																				47	1503			61.621	28.097	36	23	193	1091.36	460.443	0.779	60	1070	440	143.13	34.345	1.79	0.559	0.953	0	255	435.811		1		28.097
																				48	2116			74.714	60.245	13	3	253	777.371	466.094	0.846	60.415	751	449	155.556	51.819	1.119	0.894	0.966	0	255	234.148	1		60.245
																				49	1947			68.099	42.212	37	15	230	958.245	476.725	0.717	68.264	945	447	121.827	45.281	1.64	0.61	0.917	0	255	319.909		1		42.212
																				50	1684			67.299	35.916	57	10	253	716.047	476.502	0.624	65.115	693	464	137.49	42.426	1.349	0.741	0.86	0	255	217.554	1		35.916
																				51	2598			98.457	46.443	90	8	255	1153.28	507.356	0.604	81.216	1133	547	80.074	49.392	1.805	0.554	0.845	0	255	468.642		1		46.443
																				52	2117			95.68	59.129	75	13	255	602.119	509.385	0.87	57.489	586	533	49.939	50.873	1.074	0.931	0.964	0	255	220.819	1		59.129
																				53	1539			71.145	39.259	24	13	253	886.472	513.39	0.699	58.898	865	497	139.821	39.163	1.388	0.721	0.906	0	255	243.301	1		39.259
																				54	1779			90.413	72.345	15	2	255	743.031	533.76	0.832	52.326	730	556	63.925	47.441	1.035	0.966	0.953	0	255	161.373	1		72.345
																				55	1632			121.146	66.893	255	18	255	1108.84	543.348	0.447	78.39	1090	516	119.836	35.977	2.776	0.36	0.756	0	255	413.829		1		66.893
																				56	1850			93.106	49.293	86	18	251	339.29	539.485	0.888	53.852	315	552	31.329	46.417	1.152	0.868	0.965	0	255	413.977		1		49.293
																				57	3895			92.721	63.522	73	2	255	803.023	564.875	0.633	88.752	783	525	123.511	61.998	1.453	0.688	0.88	0	255	151.655	1		63.522
																				58	2298			83.853	45.826	81	19	255	504.688	550.253	0.746	72.236	468	537	158.051	46.96	1.49	0.671	0.926	0	255	261.665	1		45.826
																				59	3789			88.764	53.392	75	7	255	260.649	562.163	0.835	77.621	235	593	51.801	66.676	1.162	0.861	0.964	0	255	481.124		1		53.392
																				60	1636			81	43.398	47	11	234	988.771	567.677	0.582	77.13	979	532	103.496	33.474	2.48	0.403	0.901	0	255	293.895	1		43.398
																				61	883			100.771	51.257	134	18	254	601.797	564.606	0.558	57.28	594	595	73.78	27.157	2.146	0.466	0.816	0	255	177.502	1		51.257
																				62	1131			95.027	61.299	255	16	255	358.386	576.892	0.855	43.417	338	584	14.676	35.63	1.232	0.812	0.939	0	255	383.297		1		61.299
																				63	1582			93.101	46.717	78	24	249	871.851	583.197	0.768	59.615	840	594	22.694	42	1.364	0.733	0.934	0	255	185.221	1		46.717
																				64	1551			92.518	34.619	83	23	197	411.77	585.365	0.829	53.6	405	613	75.964	41.556	1.198	0.835	0.945	0	255	329.978		1		34.619
																				65	638			122.428	54.604	196	26	251	1012.3	591.738	0.676	42.426	1007	611	81.87	22	2.13	0.47	0.906	0	255	306.462	1		54.604
																				66	1632			93.562	32.731	94	8	229	635.325	595.657	0.866	54.203	617	577	127.504	42.414	1.209	0.827	0.96	0	255	131.951	1		32.731
																				67	1120			96.216	28.109	82	41	249	1076.21	595.481	0.834	43.417	1068	617	75.324	34.447	1.251	0.799	0.947	0	255	366.314		1		28.109
																				68	1528			56.784	29.639	53	9	252	164.659	604.629	0.8	58.421	160	575	96.882	35	1.672	0.598	0.955	0	255	565.81		1		29.639
																				69	789			124.608	30.59	126	39	229	435.69	609.648	0.738	45.453	419	624	39.644	25.498	1.895	0.528	0.91	0	255	299.779	1		30.59
																				70	1452			113.939	33.213	108	10	249	1203.71	615.633	0.821	53.488	1195	592	110.807	36.423	1.357	0.737	0.952	0	255	486.676		1		33.213
																				71	2734			129.873	53.518	111	28	252	955.458	640.744	0.656	81.025	949	597	114.034	52.433	1.438	0.695	0.909	0	255	238.098	1		53.518
																				72	737			136.696	51.224	139	29	230	859.957	613.702	0.714	44.272	838	603	161.565	24.801	1.847	0.541	0.918	0	255	158.401	1		51.224
																				73	2489			98.861	47.447	58	12	255	725.675	633.447	0.844	64.195	726	667	85.533	53.74	1.128	0.886	0.954	0	255	60.5286	1		47.447
																				74	2901			97.705	44.341	82	8	255	294.599	636.781	0.859	72.622	272	666	51.71	52.523	1.365	0.733	0.968	0	255	432.57		1		44.341
																				75	984			106.092	38.482	91	36	243	556.389	628.027	0.859	41.881	544	645	56.689	32	1.291	0.775	0.955	0	255	179.523	1		38.482
																				76	1307			148.385	47.922	175	32	252	991.102	643.876	0.51	75.273	976	611	109.398	26.177	3.258	0.307	0.883	0	255	272.364	1		47.922
																				77	2769			92.262	46.56	59	12	255	491.272	643.243	0.861	63.253	466	626	140.774	58.813	1.055	0.948	0.959	0	255	237.575	1		46.56
																				78	2983			120.277	48.227	104	16	255	592.191	666.32	0.705	86.006	575	701	66.714	50.993	1.859	0.538	0.924	0	255	134.06	1		48.227
																				79	2206			117.952	43.301	86	39	245	814.165	662.178	0.778	62.394	810	632	96.442	50	1.212	0.825	0.937	0	255	96.181	1		43.301
																				80	2681			110.686	51.294	43	7	255	648.509	662.776	0.694	70.831	615	669	13.055	57.04	1.194	0.838	0.881	0	255	81.092	1		51.294
																				81	914			94.195	28.642	81	41	180	1036.15	665.899	0.703	47.434	1021	688	55.305	27.651	1.751	0.571	0.918	0	255	314.028		1		28.642
																				82	1196			123.501	47.592	160	28	240	1156.54	674.175	0.777	51.478	1145	697	65.925	34.861	1.529	0.654	0.917	0	255	433.616		1		47.592
																				83	2077			83.398	36.256	99	23	252	182.691	688.616	0.84	62.37	177	719	77.969	43.614	1.437	0.696	0.955	0	255	540.712		1		36.256
																				84	1461			107.913	27.56	111	13	241	859.636	692.811	0.827	53.6	841	673	126.656	37.432	1.37	0.73	0.959	0	255	136.264	1		27.56
																				85	431			93.193	44.71	67	25	248	899.277	686.611	0.693	34.713	890	672	131.496	19.097	1.882	0.531	0.88	0	255	176.052	1		44.71
																				86	1216			135.844	35.204	157	49	236	291.331	701.377	0.756	51.478	278	722	65.925	36.143	1.504	0.665	0.931	0	255	432.11		1		35.204
																				87	2170			111.748	41.138	120	15	240	237.942	709.917	0.848	57.567	209	710	162.824	52.33	1.043	0.959	0.958	0	255	485.698		1		41.138
																				88	1213			88.102	36.624	61	31	225	679.594	720.074	0.85	46.39	658	718	172.569	38.184	1.16	0.862	0.947	0	255	50.9937	1		36.624
																				89	2257			126.537	52.032	137	28	255	611.118	738.539	0.638	76.531	606	700	96.754	48.19	1.668	0.6	0.878	0	255	120.797	1		52.032
																				90	919			108.459	22.846	118	24	181	313.149	731.51	0.804	39.85	294	734	17.526	31.805	1.241	0.806	0.921	0	255	411.946		1		22.846
																				91	2797			120.35	51.577	77	18	255	362.687	747.581	0.828	74.518	337	776	49.899	52.259	1.369	0.731	0.955	0	255	364.658		1		51.577
																				92	1787			87.779	49.515	84	9	255	935.624	753.98	0.645	67.268	944	787	84.883	43.417	1.656	0.604	0.887	0	255	220.578	1		49.515
																				93	3267			133.923	51.39	141	27	255	848.422	763.072	0.693	83.815	822	798	54.224	55.436	1.512	0.661	0.893	0	255	142.887	1		51.39
																				94	1621			136.801	65.995	255	10	255	969.766	757.077	0.761	56.4	953	782	52.927	41.975	1.329	0.752	0.921	0	255	254.352	1		65.995
																				95	302			79.457	43.98	62	25	232	996.513	749	0.688	30.265	993	764	82.405	13	2.296	0.435	0.926	0	255	278.632	1		43.98
																				96	982			110.177	45.28	80	13	226	1087.41	756.222	0.831	41.485	1068	763	15.376	34	1.137	0.879	0.942	0	255	369.328		1		45.28
																				97	745			117.587	32.416	129	36	229	777.711	758.225	0.841	36.797	768	742	132.797	29.971	1.133	0.882	0.952	0	255	84.177	1		32.416
																				98	558			132.871	29.462	118	54	253	719.504	762.532	0.72	36.069	712	746	133.877	25.353	1.438	0.695	0.889	0	255	68.7092	1		29.462
																				99	1581			127.533	43.656	129	39	255	1139.07	771.026	0.758	55.227	1123	793	58.325	41.652	1.321	0.757	0.917	0	255	422.781		1		43.656
																				100	2327			109.489	40.773	121	23	255	1243.02	783.8	0.828	67.476	1241	750	96.809	45.503	1.504	0.665	0.964	0	255	527.361		1		40.773
																				101	572			107.206	24.072	80	42	185	198.519	778.198	0.719	38.471	196	760	98.973	23.465	1.558	0.642	0.89	0	255	531.579		1		24.072
																				102	1416			116.581	28.695	110	59	222	706.333	790.98	0.499	57.385	683	806	22.543	44.169	1.109	0.902	0.796	0	255	98.5333	1		28.695
																				103	736			92.514	27.164	93	37	189	779.452	785.361	0.604	47.424	761	798	24.944	25.231	2.304	0.434	0.837	0	255	107.255	1		27.164
																				104	2387			118.059	39.547	103	28	255	496.458	814.551	0.826	66.611	467	833	35.838	51.356	1.248	0.801	0.953	0	255	256.985	1		39.547
																				105	2041			99.861	45	79	23	247	270.772	824.065	0.702	65.788	242	833	19.537	40.703	1.526	0.655	0.903	0	255	470.941		1		45
																				106	555			90.092	34.172	47	25	200	870.628	815.767	0.426	50	853	799	143.13	21.104	2.826	0.354	0.74	0	255	191.119	1		34.172
																				107	1624			135.161	47.812	160	23	252	821.802	830.789	0.738	59.841	793	825	170.38	37.756	1.675	0.597	0.91	0	255	168.574	1		47.812
																				108	707			114.269	50.202	97	18	246	544.281	842.988	0.889	36.674	526	839	168.996	25.632	1.437	0.696	0.953	0	255	233.009	1		50.202
																				109	1124			101.32	29.442	97	20	207	383.309	849.637	0.833	45.177	365	862	27.699	36.385	1.236	0.809	0.934	0	255	374.019		1		29.442
																				110	1030			93.17	51.486	56	18	251	888.244	855.858	0.619	55.362	863	841	163.202	30.216	1.858	0.538	0.89	0	255	231.087	1		51.486
																				111	2020			111.648	58.718	60	12	255	862.02	879.635	0.676	80.411	851	839	111.14	34.933	2.352	0.425	0.956	0	255	231.749	1		58.718
																				112	857			128.533	59.292	255	0	255	456.113	861.439	0.78	42.953	455	840	102.095	27.959	1.619	0.618	0.921	0	255	315.418		1		59.292
																				113	2027			119.232	42.734	88	26	244	671.56	867.462	0.569	75.452	631	849	145.257	49.924	1.64	0.61	0.841	0	255	181.101	1		42.734
																				114	1072			121.011	42.384	151	37	243	999.502	872.567	0.747	51.352	997	846	96.71	26	1.961	0.51	0.954	0	255	328.87		1		42.384
																				115	1324			108.877	40.429	73	12	237	595.171	872.048	0.665	54.203	577	853	142.496	38.184	1.319	0.758	0.888	0	255	219.459	1		40.429
																				116	2252			111.629	46.896	65	24	255	809.639	892.512	0.552	77.233	818	851	94.456	52.467	1.462	0.684	0.807	0	255	216.507	1		46.896
																				117	1093			95.739	35.297	89	28	227	398.525	887.276	0.616	47.202	384	869	143.616	40.626	1.07	0.934	0.838	0	255	378.035		1		35.297
																				118	900			109.562	33.094	109	22	183	895.183	889.812	0.725	48.765	886	914	61.858	29	1.715	0.583	0.937	0	255	260.55	1		33.094
																				119	1681			87.55	37.679	54	24	244	962.447	923.533	0.566	76.551	948	888	109.855	32.6	2.817	0.355	0.848	0	255	331.468		1		37.679
																				120	517			107.137	29.079	96	62	222	487.498	909.044	0.78	33.615	471	917	22.751	21.027	1.641	0.609	0.945	0	255	319.237		1		29.079
																				121	1689			108.413	44.032	86	26	255	252.038	937.705	0.772	64.56	246	906	106.189	35.998	1.79	0.559	0.951	0	255	530.647		1		44.032
																				122	717			142.444	42.635	135	48	246	1007.42	923.967	0.773	40.706	990	911	152.176	24.826	1.688	0.592	0.931	0	255	365.508		1		42.635
																				123	742			138.712	40.775	140	52	253	893.22	932.674	0.858	36.715	886	949	60.642	27.822	1.358	0.736	0.949	0	255	292.992	1		40.775
																				124	888			93.003	36.668	118	24	232	759.34	933.017	0.804	43.566	739	932	170.754	31.035	1.336	0.748	0.922	0	255	241.775	1		36.668
																				125	2150			136.693	48.352	131	29	255	655.573	950.021	0.735	71.113	642	984	64.156	43.968	1.5	0.667	0.934	0	255	264.913	1		48.352
																				126	611			99.155	32.854	97	40	212	723.899	933.904	0.591	45.486	703	927	146.659	24.869	1.563	0.64	0.855	0	255	239.973	1		32.854
																				127	1308			85.799	23.525	74	28	196	1084.63	953.677	0.666	52.154	1066	935	147.529	40	1.151	0.869	0.868	0	255	444.939		1		23.525
																				128	1293			100.358	24.572	76	45	164	570.679	956.597	0.724	57.009	546	951	158.385	36	1.503	0.665	0.943	0	255	303.825	1		24.572
																				129	987			113.034	38.133	88	14	232	917.268	976.545	0.832	41.437	908	994	70.253	34.217	1.251	0.799	0.931	0	255	342.73		1		38.133
																				130	1201			77.53	32.512	55	18	209	1049.71	987.7	0.65	54.562	1030	964	116.095	33.676	1.591	0.628	0.887	0	255	439.079		1		32.512
																				131	1020			153.94	44.813	255	27	255	980.819	994.793	0.771	44.777	962	983	156.297	31.759	1.383	0.723	0.912	0	255	395.972		1		44.813
																				132	877			108.333	35.236	69	49	241	263.597	1005.51	0.766	48.384	256	983	108.06	24.953	2.01	0.498	0.95	0	255	555.408		1		35.236
																				133	540			141.661	66.341	58	24	254	714.55	994.322	0.891	32.016	699	990	165.53	22	1.416	0.706	0.958	0	255	300.52	1		66.341
																				134	1896			130.338	29.79	116	5	234	599.88	1014.76	0.538	80.112	555	1006	155.674	43.832	1.877	0.533	0.794	0	255	343.776		1		29.79
																				135	2746			105.861	59.528	255	15	255	662.024	1018.58	0.823	67.897	631	1007	170.676	55.417	1.242	0.805	0.962	0	255	330.393		1		59.528
																				136	1492			152.473	77.022	255	11	255	318.082	1035.3	0.587	74.404	297	1006	126.254	27.527	2.912	0.343	0.917	0	255	529.899		1		77.022
																				137	1707			127.122	49.416	89	47	255	429.924	1026.46	0.824	57.974	400	1030	14.995	41.873	1.356	0.738	0.948	0	255	443.5		1		49.416
																				138	577			92.049	27.003	93	40	181	339.228	1026.77	0.65	41.11	323	1014	138.945	20.784	2.128	0.47	0.9	0	255	508.284		1		27.003
																				139	612			137.333	38.724	147	52	234	880.761	1026.5	0.773	36.892	869	1013	122.829	25.456	1.33	0.752	0.934	0	255	367.928		1		38.724
																				140	1889			106.532	30.076	117	35	224	797.02	1061.01	0.79	60.531	766	1061	172.405	44.402	1.247	0.802	0.94	0	255	374.392		1		30.076
																				141	1429			104.988	24.561	120	46	211	966.967	1061.12	0.717	59.548	947	1045	130.914	38.184	1.419	0.705	0.909	0	255	440.64		1		24.561
																				142	1118			132.769	41.757	144	31	233	887.922	1067.11	0.654	57.315	869	1050	132.879	31.1	1.882	0.531	0.903	0	255	407.847		1		41.757
																				143	1575			132.294	31.093	130	71	247	618.964	1085.91	0.482	59.203	607	1108	74.32	49.446	1.252	0.799	0.76	0	255	405.647		1		31.093
																				144	880			87.328	24.876	78	5	186	726.342	1082.82	0.727	42.521	712	1072	138.814	32.496	1.225	0.816	0.895	0	255	388.895		1		24.876
																				145	987			111.008	45.237	105	14	246	851.763	1113.03	0.731	47.802	836	1098	127.349	33	1.549	0.646	0.894	0	255	438.317		1		45.237
																				146	1179			91.042	32.189	54	40	214	829.401	1152.5	0.597	52.555	817	1129	111.194	34.726	1.797	0.556	0.793	0	255	470.661		1		32.189
																				147	609			108.394	44.599	142	28	229	791.544	1155.73	0.684	42.638	776	1143	140.711	21.92	2.081	0.481	0.888	0	255	466.799		1		44.599
																				148	1816			107.5	49.455	79	7	252	908.967	1178.16	0.691	68.359	875	1193	5.877	36	1.817	0.55	0.925	0	255	518.578		1		49.455
																																18.1362	0
																																10.5786	10
																																17.6265	20
																																17.8479	30
																																18.5015	40
																																18.3197	50
																																17.5823	60
																																23.1445	70
																																16.8414	80
																																18.6659	90
																																14.0681	100
																																13.0081
																																15.8693
																																14.3683
																																22.1773
																																21.4505
																																11.7015
																																13.7651
																																20.9473
																																16.4425
																																18.5722
																																16.5042	Bin	Frequency	% Freq
																																16.1959	0	0	0
																																15.5638	10	2	1.35135
																																16.469	20	105	70.9459
																																14.586	30	41	27.7027
																																19.12	40	0	0
																																24.2693	50	0	0
																																21.3144	60	0	0
																																18.1577	70	0	0
																																14.202	80	0	0
																																26.048	90	0	0
																																17.2961	100	0	0
																																19.5463	More	0	0
																																12.9633
																																14.5794
																																17.1354
																																11.788
																																23.1464
																																18.2773
Bin	0	10	20	30	40	50																										19.5017
	0	3.481	73.6784	22.6688	0.171821	0																										23.7667
	0	1.94222	2.71615	4.38443	0.297603	0																										24.9139
	3	3	3	3	3	3																										20.8893
	0	1.12134	1.56817	2.53135	0.171821	0																										14.4256
																																19.5463
% frequency	0	1.35135	70.9459	27.7027	0	0																										18.684
	0	3.93701	76.378	19.685	0	0																										18.8132
	0	5.15464	73.7113	20.6186	0.515464	0																										21.2574
																																20.2768
																																25.2907
																																17.9021
																																18.3408
																																16.2943
																																24.4106
																																16.7695
																																27.6374
																																22.4943
																																24.1712
																																24.0183
																																17.837
																																13.5201
																																18.5641
																																16.691
																																13.2115
																																16.8788
																																13.5201
																																18.1923
																																14.1541
																																16.6562
																																25.2312
																																13.7863
																																19.9903
																																22.6145
																																13.0417
																																23.44
																																19.697
																																26.7823
																																19.4295
																																22.0568
																																14.7709
																																16.0302
																																19.422
																																16.691
																																10.8096
																																16.0302
																																17.9264
																																14.4458
																																23.8318
																																12.4093
																																23.2049
																																20.9473
																																26.1
																																17.563
																																9.42452
																																12.9184
																																11.4586
																																11.2319
																																17.1977
																																21.012
																																11.9799
																																17.8697
																																14.7678
																																20.7427
																																20.4864
																																15.57
																																18.6345
																																11.4203
																																14.0681
																																17.2397
																																25.04
																																13.3756
																																23.4958
																																15.991
																																16.8788
																																24.0504
																																14.6987
																																15.1854
																																23.838
																																10.4677
																																20.104
																																12.6758
																																11.4331
																																13.5665
																																22.1446
																																14.1643
																																16.2408
																																17.7526
																																12.9035
																																16.9906
																																13.9436
																																15.0668
																																9.96978
																																24.9469
																																21.1431
																																23.1694
																																18.0531
																																12.8017
																																11.4882
																																18.8494
																																18.5432
																																17.8479
																																18.4358
																																13.241
																																14.8855
																																16.3656
																																13.2775
																																21.287
[truncated: 60 more columns]

## Sheet: ANOVA1w
Nerve area
	A	B	C				PBS	CNTF	FGF2
A		0.5084	0.2955			PBS		ns	ns
B	1.63		0.8978			CNTF			ns
C	2.259	0.6295				FGF2
Cell #
	A	B	C				PBS	CNTF	FGF2
A		0.001735	0.03624			PBS		**	*
B	7.258		0.1381			CNTF			ns
C	4.243	3.015				FGF2
Cells/area
	A	B	C				PBS	CNTF	FGF2
A		0.002227	0.00584			PBS		**	**
B	6.976		0.7611			CNTF			ns
C	5.965	1.011				FGF2
Cell average area
	A	B	C				PBS	CNTF	FGF2
A		0.9888	0.4226			PBS		ns	ns
B	0.2028		0.4981			CNTF			ns
C	1.859	1.656				FGF2
Cell Area Fraction
	A	B	C				PBS	CNTF	FGF2
A		0.009362	0.1585			PBS		**	ns
B	5.502		0.2082			CNTF			ns
C	2.884	2.619				FGF2

## Sheet: PBS2w
																								pixel size	0.3114
		0.456369	Overall Means																				A5	PBS 2w 1849 1000u 20x A-D
Nerve area	Nerve diam	Cells/mm2	Cell#	Av Area	Tot Cell Area	Area frac	Mean	Stdev	Circ.	Feret	%Periph	CentrSD	PeriphSD	C/P Ratio		Nerve area	Nerve Feret (diam)	Centroid X	Centroid Y	Cell#	Area	Tot Area	Area frac	Mean	Stdev	Mode	Min	Max	XM	XY	Circ.	Feret	FeretX	FeretY	FeretAngle	MinFeret	AR	Round	Solidity	Min Thr	Max Thr	Centr dist	%Center	%Periph	CentrSD	PeriphSD		Nerve area	Nerve Feret (diam)
182651	519.886	293.88	52.3333	112.723	5889.86	0.0336801	101.653	28.6246	0.705487	16.3884	74.8392	21.6486	28.1602	0.777928		195978	524.899	276.598	277.639	57	85.1175	4851.7	0.0247563	93.8835	28.7123	87.7368	31.5614	179.474			0.692246	14.6795										166.221	101.754	73.6842	8.42034	27.3386		197398	545.414
24323.2	28.3689	92.797	10.7858	25.2961	1904.26	0.0161481	18.7894	3.63884	0.0114744	1.75277	2.31101	11.4685	4.69509	0.432292							34.3435			21.1265	7.89212	34.8735	14.6446	32.0497			0.120479	3.92598										58.0984			14.7334	7.96693
3	3	3	3	3	3	3	3	3	3	3	3	3	3	3						SEM	4.54891			2.79828	1.04534	4.61911	1.93973	4.24508			0.0159579	0.520009										7.69533			2.74959	0.850551
14043	16.3788	53.5764	6.22718	14.6047	1099.42	0.00932313	10.8481	2.10088	0.00662477	1.01196	1.33426	6.62133	2.71071	0.249584
																2021017	1685.61	888.239	891.582	57	877.772	50033		93.8835	28.7123	87.7368	31.5614	179.474			0.692246	47.1405										533.786	101.754	73.6842	8.42034	27.3386		2035664	1751.49
																					354.167			21.1265	7.89212	34.8735	14.6446	32.0497			0.120479	12.6075										186.572			14.7334	7.96693
195978	524.899	290.849	57	85.1175	4851.7	0.0247563	93.8835	28.7123	0.692246	14.6795	73.6842	8.42034	27.3386	0.308002						SEM	46.9105			2.79828	1.04534	4.61911	1.93973	4.24508			0.0159579	1.66991										24.712			2.74959	0.850551
197398	545.414	202.636	40	118.257	4730.29	0.0239632	123.081	32.2188	0.7125	16.3036	77.5	28.7981	33.2118	0.867104
154577	489.344	388.156	60	134.793	8087.59	0.0523207	87.9945	24.9427	0.711717	18.182	73.3333	27.7272	23.9301	1.15868						1	663			126.719	26.18	137	49	206	1234.58	185.379	0.695	44.294	1215	196	28.301	21.867	2.161	0.463	0.94	0	255	786.559		1		26.18
																				2	1085			108.006	32.615	111	43	213	1276.22	205.985	0.642	60.828	1245	214	9.462	23.955	2.663	0.376	0.949	0	255	787.763		1		32.615
																				3	1362			85.872	17.72	84	27	148	646.54	254.937	0.821	49.649	621	260	18.8	39.213	1.173	0.852	0.954	0	255	680.981		1		17.72
																				4	683			93.893	22.258	99	43	163	890.051	304.572	0.68	42.72	874	297	159.444	25	1.73	0.578	0.89	0	255	587.013		1		22.258
																				5	1218			68.78	18.1	58	40	167	958.463	340.824	0.816	48.27	935	338	166.827	37	1.235	0.81	0.929	0	255	555.217		1		18.1
																				6	1368			124.815	38.789	133	33	233	1472.01	381.23	0.509	64.637	1436	369	145.081	38.461	1.785	0.56	0.776	0	255	775.398		1		38.789
																				7	611			82.939	26.541	56	40	148	699.001	379.88	0.867	34.986	688	366	120.964	25.904	1.323	0.756	0.951	0	255	545.573		1		26.541
																				8	1764			93.938	18.535	83	47	188	1062.99	411.278	0.687	68.6	1029	427	30.677	40.329	1.727	0.579	0.898	0	255	511.105		1		18.535
																				9	1211			121.673	26.875	140	51	178	1351.04	410.141	0.826	48.01	1338	390	125.676	35.928	1.267	0.789	0.945	0	255	667.81		1		26.875
																				10	1144			96.707	30.661	108	24	156	1389.32	416.554	0.808	47.381	1371	404	135.855	36	1.18	0.848	0.932	0	255	690.461		1		30.661
																				11	1565			92.655	27.674	58	32	182	1167.19	447.492	0.483	81.609	1126	417	143.973	35.221	2.464	0.406	0.831	0	255	524.435		1		27.674
																				12	1279			126.715	42.425	151	31	226	1455.18	457.937	0.609	56.08	1433	443	140.064	34.766	1.544	0.648	0.823	0	255	713.772		1		42.425
																				13	524			102.521	27.394	72	50	167	1204.13	559.691	0.627	39.56	1186	550	159.274	22.524	1.565	0.639	0.849	0	255	458.189		1		27.394
																				14	1084			121.753	36.985	86	52	193	1227.14	583.696	0.757	47.265	1202	586	173.928	35	1.334	0.749	0.93	0	255	457.871		1		36.985
																				15	1148			125.596	48.223	145	20	219	1296.45	596.144	0.788	45.343	1282	577	131.424	34.895	1.296	0.772	0.917	0	255	503.902		1		48.223
																				16	875			108.378	20.795	99	65	174	1195.26	662.038	0.782	42.72	1191	684	73.686	28.606	1.498	0.667	0.943	0	255	383.341	1		20.795
																				17	720			80.219	18.195	87	41	138	1392.83	658.533	0.817	37.802	1379	670	37.476	26.549	1.417	0.706	0.946	0	255	555.806		1		18.195
																				18	958			86.79	21.985	98	42	181	1306.56	675.983	0.502	64.661	1285	659	148.276	25.79	2.745	0.364	0.862	0	255	470.614		1		21.985
																				19	496			113.103	24.533	122	38	169	1579.4	694.075	0.697	38.013	1564	683	153.435	19.647	2.049	0.488	0.899	0	255	718.826		1		24.533
																				20	1152			113.104	33.328	81	33	193	1239.16	715.066	0.523	71.063	1211	694	140.711	28.611	2.441	0.41	0.868	0	255	392.815	1		33.328
																				21	616			97.846	38.015	67	33	234	604.964	725.615	0.843	33.287	595	712	122.735	27	1.139	0.878	0.951	0	255	328.314	1		38.015
																				22	1431			57.2	21.246	42	29	160	1383.31	790.514	0.547	65.863	1357	770	149.931	37.561	1.74	0.575	0.846	0	255	505.277		1		21.246
																				23	1423			112.902	44.848	150	18	183	697.116	792.789	0.738	59.363	681	768	122.619	34.98	1.597	0.626	0.928	0	255	215.147	1		44.848
																				24	858			108.07	26.646	105	25	189	798.181	811.58	0.71	40.522	782	821	15.751	31.144	1.343	0.745	0.897	0	255	120.461	1		26.646
																				25	606			68.444	31.548	56	11	143	528.696	898.106	0.522	46.53	518	916	61.783	26	1.979	0.505	0.765	0	255	359.602	1		31.548
																				26	989			112.114	27.49	117	42	222	392.077	945.154	0.502	60.415	363	943	167.574	27.522	2.202	0.454	0.815	0	255	499.046		1		27.49
																				27	972			124.096	36.004	131	44	217	990.569	952	0.704	54.129	965	959	11.725	24	2.261	0.442	0.946	0	255	118.835	1		36.004
																				28	712			110.83	36.382	137	11	172	551.6	961.02	0.727	39.459	531	966	8.746	27.765	1.347	0.743	0.868	0	255	343.726	1		36.382
																				29	480			77.433	44.664	23	15	172	429.144	964.74	0.651	36.401	414	974	37.185	20.506	1.94	0.516	0.866	0	255	464.887		1		44.664
																				30	1193			71.077	29.185	42	23	163	1230.54	981.162	0.634	62.482	1205	959	140.194	31.37	1.963	0.509	0.879	0	255	353.827	1		29.185
																				31	936			108.436	29.054	119	10	176	349.51	991.36	0.755	49.82	326	998	10.408	26	1.843	0.542	0.938	0	255	547.891		1		29.054
																				32	660			96.929	43.578	41	29	232	394.776	1009.46	0.778	35.805	387	994	125.91	28.36	1.138	0.879	0.926	0	255	507.347		1		43.578
																				33	1545			92.606	29.226	111	32	180	1101.24	1044.42	0.578	60.133	1072	1049	176.186	43.355	1.218	0.821	0.843	0	255	262.161	1		29.226
																				34	623			109.34	16.623	101	64	161	385.652	1051.97	0.715	38.21	365	1052	173.991	22	1.61	0.621	0.925	0	255	527.56		1		16.623
																				35	530			36.198	23.799	15	2	110	136.417	1067.77	0.546	46.872	126	1047	123.69	16.749	3.074	0.325	0.847	0	255	772.191		1		23.799
																				36	359			50.46	21.929	34	12	117	152.068	1065.07	0.729	33.242	147	1051	111.161	17.647	1.948	0.513	0.925	0	255	756.337		1		21.929
																				37	1231			96.929	40.222	89	34	246	946.714	1099.87	0.728	53.6	925	1086	143.344	32.527	1.868	0.535	0.897	0	255	216.338	1		40.222
																				38	891			93.951	29.247	106	9	222	339.973	1093.2	0.655	51.196	314	1102	12.407	25.231	2.089	0.479	0.885	0	255	584.162		1		29.247
																				39	458			60.712	23.124	53	19	147	166.376	1117.9	0.642	37	161	1101	108.925	18.568	2.339	0.427	0.867	0	255	756.508		1		23.124
																				40	405			92.388	24.451	108	38	171	249.325	1127.72	0.796	31.385	243	1114	120.651	18.342	1.75	0.572	0.944	0	255	681.156		1		24.451
																				41	585			60.726	23.201	29	15	121	163.898	1153.49	0.885	32.202	158	1139	115.769	26.002	1.199	0.834	0.943	0	255	770.239		1		23.201
																				42	779			92.783	29.236	93	42	215	1055.32	1154.85	0.736	46.174	1033	1151	162.35	23.316	1.997	0.501	0.931	0	255	311.811	1		29.236
																				43	394			105.104	33.2	105	25	200	823.569	1150.73	0.891	25.612	813	1142	128.66	21	1.084	0.922	0.948	0	255	267.096	1		33.2
																				44	782			80.078	17.913	87	27	139	193.482	1160.72	0.814	37.014	180	1148	128.418	29	1.13	0.885	0.943	0	255	745.065		1		17.913
																				45	475			86.522	36.649	42	25	184	1244.28	1156.38	0.849	27.803	1235	1147	142.306	24.519	1.051	0.952	0.933	0	255	443.71		1		36.649
																				46	502			105.612	22.976	115	37	226	755.865	1178	0.856	31.623	744	1168	145.305	23.702	1.317	0.759	0.929	0	255	315.532	1		22.976
																				47	500			81.292	29.784	56	10	156	206.606	1203.86	0.755	35	196	1191	126.87	22.556	1.662	0.602	0.89	0	255	749.762		1		29.784
																				48	1035			119.515	23.027	116	70	210	1129.11	1263.82	0.642	52.202	1107	1249	143.569	29.212	1.95	0.513	0.893	0	255	443.376		1		23.027
																				49	1157			79.54	36.769	34	24	184	900.408	1284.78	0.478	60.638	891	1323	76.651	36.423	1.329	0.753	0.742	0	255	393.389	1		36.769
																				50	630			104.359	36.266	68	45	215	1046.84	1296.93	0.794	36.892	1036	1282	122.829	26.759	1.45	0.69	0.918	0	255	435.277		1		36.266
																				51	815			83.778	33.102	96	18	166	675.694	1318.68	0.561	46.325	657	1334	32.661	25.359	2.234	0.448	0.81	0	255	477.061		1		33.102
																				52	1141			112.909	26.686	112	25	186	457.69	1353.27	0.749	50.16	450	1376	66.501	30.669	1.65	0.606	0.909	0	255	631.29		1		26.686
																				53	414			81.215	25.288	86	30	168	500.763	1424.8	0.751	27.514	488	1431	19.093	22.753	1.302	0.768	0.872	0	255	659.131		1		25.288
																				54	543			88.033	21.876	73	29	171	442.216	1510.62	0.528	48.021	426	1501	148.627	21.027	2.428	0.412	0.844	0	255	762.981		1		21.876
																				55	611			90.45	22.626	114	34	149	452.063	1554.9	0.636	45.607	435	1537	142.125	19.414	2.394	0.418	0.92	0	255	793.879		1		22.626
																				56	613			71.53	20.592	66	22	142	609.973	1612.73	0.693	41.231	595	1599	129.094	22.998	1.875	0.533	0.888	0	255	772.975		1		20.592
																				57	1229			55.779	20.32	54	20	139	917.828	1656.04	0.404	73.783	896	1641	147.171	35.91	2.257	0.443	0.743	0	255	765.032		1		20.32
																																											1		0
																																											1		0
																																											1		0
																																											1		0
																																											1		0
																																											1		0
																																											1		0
																																											1		0
																																											1		0
																																											1		0
																																											1		0
																																											1		0
																																											1		0
																																											1		0
																																											1		0
																																											1		0
																																											1		0
																																											1		0
																																											1		0
																																											1		0
																																											1		0
																																											1		0
																																											1		0
																																											1		0
																																											1		0
																																											1		0
																																											1		0
																																											1		0
																																											1		0
																																											1		0
																																											1		0
																																											1		0
																																											1		0
																																											1		0
																																											1		0
																																											1		0
																																											1		0
																																											1		0
																																											1		0
																																											1		0
																																											1		0
																																											1		0
																																											1		0
																																13.7932	0
																																18.9418	10
																																15.4607	20
																																13.303	30
																																15.0313	40
																																20.128	50
																																10.8946	60
																																21.362	70
																																14.9503	80
																																14.7544	90
																																25.413	100
																																17.4633
																																12.319
																																14.7183
																																14.1198
																																13.303
																																11.7715
																																20.1354
																																11.8372
																																22.129
																																10.3656
																																20.5097	Bin	Frequency	% Freq
																																18.4856	0	0	0
																																12.6186	10	5	8.77193
																																14.4894	20	45	78.9474
																																18.8132	30	7	12.2807
																																16.8558	40	0	0
																																12.2875	50	0	0
																																11.3353	60	0	0
																																19.4569	70	0	0
																																15.5139	80	0	0
																																11.1497	90	0	0
																																18.7254	100	0	0
																																11.8986	More	0	0
																																14.5959
																																10.3516
																																16.691
																																15.9424
																																11.5218
																																9.77329
Bin	0	10	20	30	40	50																										10.0277
	0	3.75731	76.8713	18.2602	1.11111	0																										14.3786
	0	4.5191	4.53801	6.39364	1.9245	0																										7.97558
	3	3	3	3	3	3																										11.5262
	0	2.60911	2.62002	3.69137	1.11111	0																										8.65785
% frequency																																9.8474
	0	8.77193	78.9474	12.2807	0	0																										10.899
	0	2.5	80	17.5	0	0																										16.2557
	0	0	71.6667	25	3.33333	0																										18.8827
																																11.4882
																																14.4256
																																15.6198
																																8.56786
																																14.9537
																																14.202
																																12.8393
																																22.976
[truncated: 60 more columns]

## Sheet: CNTF2w
0.877584		3.01696
			Overall Means																				D2	CNTF 2w 1731 1000u 20x A-B
Nerve area	Nerve diam	Cells/mm2	Cell#	Av Area	Tot Cell Area	Area frac	Mean	Stdev	Circ.	Feret	%Periph	CentrSD	PeriphSD	C/P Ratio		Nerve area	Nerve Feret (diam)	Centroid X	Centroid Y	Cell#	Area	Tot Area	Area frac	Mean	Stdev	Mode	Min	Max	XM	XY	Circ.	Feret	FeretX	FeretY	FeretAngle	MinFeret	AR	Round	Solidity	Min Thr	Max Thr	Centr dist	%Center	%Periph	CentrSD	PeriphSD		Nerve area	Nerve Feret (diam)
160292	500.174	886.624	131.25	116.671	15127	0.105088	105.239	40.0507	0.722146	16.2696	65.5044	29.1056	41.4771	0.711114		108150	391.759	207.385	186.863	119	136.883	16289.1	0.150617	110.031	42.9646	110.042	14.9916	229.412			0.765504	16.9668										142.937	64.7059	84.0336	9.27057	43.9896		137169	504.413
48532.8	77.9652	322.883	32.0871	19.0802	3512.82	0.047685	13.5197	3.88479	0.0429975	0.83163	26.504	14.975	2.70199	0.36807							67.1936			17.3726	8.29616	36.4562	11.8089	18.4609			0.125116	4.84051										38.2453			16.6161	8.21535
4	4	4	4	4	4	4	4	4	4	4	4	4	4	4						SEM	6.15963			1.59255	0.760508	3.34194	1.08252	1.6923			0.0114693	0.443729										3.50594			2.53497	0.783153
24266.4	38.9826	161.442	16.0436	9.54009	1756.41	0.0238425	6.75987	1.9424	0.0214987	0.415815	13.252	7.4875	1.35099	0.184035
																1115289	1258.06	665.975	600.074	119	1411.61	167981		110.031	42.9646	110.042	14.9916	229.412			0.765504	54.4854										459.015	64.7059	84.0336	9.27057	43.9896		1414549	1619.82
																					692.932			17.3726	8.29616	36.4562	11.8089	18.4609			0.125116	15.5443										122.817			16.6161	8.21535
108150	391.759	1100.33	119	136.883	16289.1	0.150617	110.031	42.9646	0.765504	16.9668	84.0336	9.27057	43.9896	0.210745						SEM	63.521			1.59255	0.760508	3.34194	1.08252	1.6923			0.0114693	1.42495										11.2586			2.53497	0.783153
137169	504.413	1100.83	151	124.536	18805	0.137094	118.828	35.1559	0.740589	16.5966	26.4901	34.2259	37.7366	0.906968
175784	529.486	927.274	163	91.965	14990.3	0.0852767	105.315	38.7108	0.664632	15.0656	79.7546	27.953	41.4416	0.674516						1	2196			98.182	41.895	86	10	249	582.2	32.954	0.532	94.372	538	50	15.362	36.194	2.727	0.367	0.859	0	255	573.274		1		41.895
220065	575.038	418.059	92	113.299	10423.5	0.0473656	86.7802	43.3717	0.717859	16.4494	71.7391	44.9731	42.7408	1.05223						2	1402			116.295	45.976	153	4	208	640.83	42.792	0.696	65.552	609	54	21.477	29.569	2.295	0.436	0.946	0	255	557.849		1		45.976
																				3	1102			118.441	44.718	103	13	250	692.855	43.508	0.836	46.648	675	30	149.036	30.752	1.428	0.7	0.96	0	255	557.215		1		44.718
																				4	846			112.934	38.586	159	14	199	736.323	45.034	0.759	45.343	720	29	131.424	25.502	1.652	0.605	0.942	0	255	559.48		1		38.586
																				5	1392			101.776	40.996	84	12	206	463.542	60.297	0.814	48.01	439	68	35.676	41.934	1.03	0.971	0.928	0	255	576.488		1		40.996
																				6	1186			97.943	38.888	78	25	241	783.594	51.945	0.786	54.129	757	47	168.275	27	1.975	0.506	0.967	0	255	560.606		1		38.888
																				7	1549			89.628	42.034	57	13	232	853.917	72.898	0.727	63.6	831	50	126.69	36.062	1.733	0.577	0.925	0	255	559.676		1		42.034
																				8	2062			117.071	40.379	144	12	206	508.225	81.99	0.706	64.203	483	95	37.405	50	1.123	0.891	0.887	0	255	541.568		1		40.379
																				9	952			85.06	40.301	79	12	248	889.959	91.838	0.823	42.72	882	70	122.574	33	1.232	0.811	0.935	0	255	555.403		1		40.301
																				10	1642			101.325	40.544	137	7	203	433.78	94.03	0.842	58.241	405	103	15.945	41	1.382	0.724	0.956	0	255	556.772		1		40.544
																				11	644			86.862	34.582	94	17	212	470.548	107.775	0.845	34.828	456	119	50.826	27.735	1.238	0.808	0.948	0	255	529.67		1		34.582
																				12	1346			78.903	38.318	61	0	222	508.952	122.798	0.729	59.682	485	139	31.293	31.98	1.87	0.535	0.951	0	255	502.443		1		38.318
																				13	1286			114.569	43.129	158	25	231	897.471	133.361	0.871	46.648	886	114	120.964	35.153	1.3	0.769	0.957	0	255	520.972		1		43.129
																				14	714			124.308	29.453	134	36	215	791.824	136.539	0.891	35.777	785	121	116.565	27.284	1.308	0.765	0.957	0	255	480.315		1		29.453
																				15	2070			101.766	42.381	102	16	240	944.075	165.527	0.531	93.862	916	121	128.946	37.842	2.397	0.417	0.875	0	255	515.917		1		42.381
																				16	2047			82.849	40.388	61	10	239	983.631	159.51	0.774	70.605	961	131	127.519	39.598	1.888	0.53	0.952	0	255	543.141		1		40.388
																				17	571			121.524	51.018	108	36	243	538.827	150.549	0.896	30.463	524	155	23.199	26.84	1.145	0.873	0.945	0	255	467.161		1		51.018
																				18	1864			79.22	27.707	57	19	199	298.185	167.652	0.816	58.6	274	149	143.326	45.97	1.254	0.798	0.955	0	255	567.678		1		27.707
																				19	650			123.758	38.789	134	11	226	562.475	181.829	0.621	45.188	557	203	65.136	21.571	2.444	0.409	0.85	0	255	430.861		1		38.789
																				20	1454			136.858	58.779	149	14	255	478.439	186.922	0.868	54.12	456	204	27.512	36.859	1.42	0.704	0.967	0	255	453.723		1		58.779
																				21	437			100.259	39.066	80	36	215	334.974	181.891	0.825	30	325	171	143.13	21.687	1.357	0.737	0.909	0	255	533.328		1		39.066
																				22	3236			125.534	40.549	126	2	244	301.41	220.65	0.834	75.452	279	250	55.257	56.731	1.295	0.772	0.956	0	255	526.185		1		40.549
																				23	1313			125.264	32.535	116	5	241	744.433	224.814	0.777	52.326	717	215	153.925	36.659	1.347	0.742	0.908	0	255	383.374		1		32.535
																				24	588			116.017	26.333	113	41	212	910.66	232.529	0.835	34.132	896	224	148.173	25.899	1.344	0.744	0.927	0	255	441.543		1		26.333
																				25	964			110.872	46.618	146	20	237	258.573	253.535	0.892	42.154	249	235	112.306	31	1.25	0.8	0.961	0	255	534.851		1		46.618
																				26	812			105.416	53.226	134	11	229	181.597	264.549	0.74	46.325	168	283	57.339	27.577	1.789	0.559	0.908	0	255	589.236		1		53.226
																				27	782			111.271	35.233	106	11	205	509.471	264.815	0.744	41.4	495	281	52.853	29.376	1.469	0.681	0.9	0	255	369.989		1		35.233
																				28	2288			118.81	47.04	85	9	238	341.021	280.421	0.704	69.116	317	257	121.39	45	1.469	0.681	0.917	0	255	455.821		1		47.04
																				29	712			119.638	37.293	139	31	210	1078.76	272.871	0.847	37.947	1071	290	71.565	23	1.598	0.626	0.963	0	255	526.736		1		37.293
																				30	1430			104.924	41.263	61	24	227	229.815	275.762	0.856	50.804	217	255	126.193	36.337	1.419	0.705	0.957	0	255	543.52		1		41.263
																				31	693			93.391	36.264	81	22	228	406.552	278.895	0.848	37.014	393	269	141.582	27.506	1.206	0.829	0.947	0	255	412.863		1		36.264
																				32	1659			106.192	42.249	71	2	224	280.786	288.508	0.819	55.946	257	303	28.856	42.179	1.347	0.743	0.94	0	255	495.423		1		42.249
																				33	1487			115.508	35.449	112	25	246	562.136	313.589	0.763	57.454	546	338	58.523	37.877	1.635	0.612	0.922	0	255	304.723	1		35.449
																				34	707			114.492	45.595	162	19	226	1084.18	314.097	0.841	39.56	1081	295	106.144	26	1.518	0.659	0.951	0	255	506.636		1		45.595
																				35	1105			125.202	36.787	115	20	213	1112.49	331.976	0.823	46.228	1102	308	128.853	35.355	1.255	0.797	0.952	0	255	520.818		1		36.787
																				36	1181			130.576	43.674	108	32	254	737.393	332.779	0.825	49.396	727	311	111.371	31.136	1.6	0.625	0.941	0	255	276.672	1		43.674
																				37	1508			110.601	48.537	142	12	239	197.982	332.751	0.709	62.769	171	319	157.521	34.933	1.979	0.505	0.926	0	255	538.961		1		48.537
																				38	917			74.888	37.714	54	2	215	163.983	349.307	0.835	45.277	149	334	136.79	30.192	1.461	0.685	0.958	0	255	561.142		1		37.714
																				39	762			150.387	63.344	195	23	253	1074.03	352.035	0.913	34.67	1058	360	33.232	29	1.055	0.948	0.964	0	255	477.524		1		63.344
																				40	1226			126.669	34.555	140	34	208	650.306	367.692	0.802	47.927	631	359	156.644	36.544	1.276	0.784	0.932	0	255	232.91	1		34.555
																				41	1015			123.208	53.823	149	16	240	204.45	364.937	0.841	45.277	186	374	30.53	32.896	1.353	0.739	0.961	0	255	517.972		1		53.823
																				42	1556			94.026	39.682	78	12	217	1123.16	373.767	0.844	53.6	1101	355	143.344	40.375	1.234	0.81	0.953	0	255	510.129		1		39.682
																				43	798			112.529	33.974	108	31	237	477.761	380.5	0.855	36.401	471	398	69.075	28.246	1.205	0.83	0.954	0	255	289.201	1		33.974
																				44	1152			123.338	36.866	90	33	210	427.574	390.858	0.773	52.154	417	368	122.471	29.614	1.87	0.535	0.937	0	255	317.185		1		36.866
																				45	879			124.067	27.895	110	46	239	861.115	397.138	0.929	36.688	857	415	72.553	33	1.057	0.946	0.96	0	255	281.536	1		27.895
																				46	2080			102.556	54.99	45	6	240	153.489	423.513	0.85	60.166	140	450	68.552	46.63	1.331	0.751	0.954	0	255	542.048		1		54.99
																				47	1599			96.904	50.069	62	0	249	1122.88	421.953	0.324	55.902	1114	447	63.435	46.73	1.019	0.981	0.82	0	255	490.397		1		50.069
																				48	1613			124.017	30.809	118	41	222	387.245	424.284	0.84	54.672	366	405	140.194	39.026	1.322	0.757	0.957	0	255	329.534		1		30.809
																				49	1915			116.089	39.776	116	23	255	552.597	475.079	0.78	63.063	540	443	117.378	42.92	1.48	0.676	0.94	0	255	168.755	1		39.776
																				50	1444			138.089	32.755	130	27	250	732.122	467.089	0.855	52.631	705	473	14.3	38.391	1.413	0.708	0.953	0	255	148.528	1		32.755
																				51	922			104.348	51.317	131	14	244	1129.79	469.652	0.765	45.398	1126	492	82.405	28.636	1.63	0.614	0.917	0	255	481.803		1		51.317
																				52	2320			98.797	43.989	91	12	242	149.584	489.553	0.783	69.462	141	457	112.874	50.045	1.386	0.722	0.948	0	255	528.086		1		43.989
																				53	1191			116.003	58.718	78	14	236	206.063	480.37	0.868	44.294	194	500	61.699	37.444	1.155	0.866	0.943	0	255	475.235		1		58.718
																				54	4583			106.85	45.697	141	4	255	1160.1	500.318	0.239	113.534	1099	518	5.56	69.479	1.695	0.59	0.801	0	255	504.09		1		45.697
																				55	1389			118.95	29.047	120	32	204	433.033	510.376	0.886	46.84	427	534	73.887	40	1.157	0.864	0.962	0	255	249.615	1		29.047
																				56	425			108.08	37.095	112	34	229	739.368	507.684	0.874	27.857	725	505	158.962	20.965	1.262	0.793	0.936	0	255	117.993	1		37.095
																				57	1268			93.402	41.747	85	0	236	143.081	529.729	0.667	55.471	122	506	123.977	34.45	1.686	0.593	0.883	0	255	527.605		1		41.747
																				58	667			111.99	33.217	110	7	224	576.338	545.385	0.901	32.802	567	559	52.431	27	1.127	0.887	0.956	0	255	105.003	1		33.217
																				59	1497			102.644	38.912	140	4	207	122.377	570.31	0.701	63.325	109	602	74.427	38.492	1.715	0.583	0.884	0	255	544.412		1		38.912
																				60	1573			126.209	46.197	142	28	230	214.538	578.628	0.766	63.325	202	608	68.703	36.092	1.729	0.578	0.947	0	255	451.946		1		46.197
																				61	1990			112.097	37.739	141	16	233	318.894	596.996	0.716	77.466	312	559	101.165	35	2.202	0.454	0.955	0	255	347.095		1		37.739
																				62	1512			108.297	44.167	99	16	236	139.128	606.707	0.771	59.808	128	634	69.444	37.717	1.468	0.681	0.944	0	255	526.889		1		44.167
																				63	1351			104.198	48.521	53	11	235	100.27	635.423	0.625	60.415	87	607	102.426	34.108	1.894	0.528	0.856	0	255	566.808		1		48.521
																				64	911			83.962	33.407	75	8	182	1204.12	645.364	0.838	39.962	1191	627	121.701	31.493	1.179	0.848	0.951	0	255	540.048		1		33.407
																				65	1713			82.506	42.13	72	5	222	128.342	665.385	0.821	54.203	121	638	119.876	45	1.105	0.905	0.959	0	255	541.585		1		42.13
																				66	830			115.313	36.276	112	27	234	812.824	701.404	0.868	39.623	806	682	100.176	29	1.325	0.755	0.946	0	255	178.416	1		36.276
																				67	3140			100.919	50.853	163	0	233	143.739	718.412	0.387	86.023	104	698	144.462	55.442	1.681	0.595	0.868	0	255	535.476		1		50.853
																				68	2026			122.87	39.181	131	30	238	455.715	732.48	0.82	61.612	448	703	103.134	46.606	1.346	0.743	0.945	0	255	248.477	1		39.181
																				69	1517			131.97	34.314	120	40	244	800.937	751.745	0.549	74.061	784	713	124.548	33.013	2.462	0.406	0.874	0	255	203.024	1		34.314
																				70	832			116.925	39.688	130	8	227	917.617	739.213	0.851	39.825	901	752	38.884	29.698	1.299	0.77	0.939	0	255	287.547	1		39.688
																				71	1005			106.285	34.474	99	18	223	1090.16	759.617	0.898	41.593	1071	767	27.181	33	1.217	0.822	0.957	0	255	453.199		1		34.474
																				72	1784			138.478	50.398	147	7	250	360.904	773.328	0.797	59.908	358	746	104.5	44	1.317	0.759	0.931	0	255	350.835		1		50.398
																				73	1967			106.065	53.129	141	0	238	149.909	776.43	0.662	65.552	125	748	111.477	50.506	1.174	0.852	0.866	0	255	545.367		1		53.129
																				74	1287			138.221	46.633	125	42	252	694.188	772.697	0.902	45.88	684	794	69.59	37	1.156	0.865	0.959	0	255	174.913	1		46.633
																				75	1506			129.157	56.966	93	17	254	630.67	792.227	0.764	50.596	606	800	18.435	42.163	1.245	0.803	0.908	0	255	195.369	1		56.966
																				76	694			106.614	34.695	105	14	192	851.219	796.291	0.778	36.674	842	779	115.866	28.134	1.34	0.746	0.909	0	255	269.845	1		34.695
																				77	1002			79.998	41.37	76	8	239	1184.31	815.15	0.774	49.396	1172	838	68.629	28.194	1.836	0.545	0.941	0	255	561.182		1		41.37
																				78	1699			122.918	51.278	75	17	236	923.376	845.123	0.742	57.706	921	873	81.027	37.564	1.611	0.621	0.913	0	255	355.393		1		51.278
																				79	1033			136.731	36.822	163	11	227	595.186	844.525	0.849	46.487	586	823	108.825	29.691	1.554	0.644	0.952	0	255	254.494	1		36.822
																				80	2164			121.891	42.098	113	18	251	840.607	865.947	0.873	60.166	833	835	111.448	49	1.184	0.845	0.963	0	255	318.096		1		42.098
																				81	1542			95.506	47.602	40	2	243	1168.23	873.563	0.58	75.717	1147	902	56.31	29.092	2.784	0.359	0.91	0	255	571.891		1		47.602
																				82	1489			96.721	41.334	70	10	205	258.969	864.327	0.79	58.728	240	844	132.93	38.112	1.55	0.645	0.957	0	255	485.266		1		41.334
																				83	498			101.145	32.291	117	26	227	1115.86	854.91	0.816	29.682	1102	847	147.381	24	1.14	0.877	0.904	0	255	517.043		1		32.291
																				84	1667			105.896	51.051	155	4	235	209.382	868.01	0.832	51.225	190	850	141.34	45.24	1.04	0.961	0.946	0	255	529.402		1		51.051
																				85	447			108.832	33.887	114	19	201	980.997	863.017	0.786	30.017	976	849	119.982	20.566	1.467	0.681	0.934	0	255	410.339		1		33.887
																				86	1492			108.442	41.822	138	1	245	643.784	894.716	0.861	49.396	634	871	121.759	41.589	1.149	0.87	0.964	0	255	295.476	1		41.822
																				87	648			119.963	51.663	161	7	240	1184.11	902.407	0.691	46.53	1174	924	61.783	21.363	2.334	0.428	0.925	0	255	599.894		1		51.663
																				88	1565			89.562	39.968	49	5	193	268.609	912.293	0.693	68.242	249	885	124.854	33.103	2.13	0.469	0.908	0	255	505.352		1		39.968
																				89	1166			94.514	39.355	92	24	242	492.704	912.688	0.864	45.607	472	900	142.125	36.77	1.22	0.82	0.95	0	255	357.422		1		39.355
																				90	1502			119.822	56.075	66	19	244	384.822	924.921	0.775	58.873	376	900	110.898	37.32	1.609	0.621	0.932	0	255	429.619		1		56.075
																				91	782			118.893	53.471	84	32	253	751.309	925.485	0.795	41.231	734	915	140.906	27.294	1.474	0.678	0.929	0	255	336.414		1		53.471
																				92	1611			122.636	42.987	172	20	218	872.519	936.79	0.768	56.08	854	960	50.064	44.766	1.411	0.709	0.907	0	255	395.017		1		42.987
																				93	1199			131.321	54.323	116	0	255	1083.65	930.197	0.604	57.009	1054	936	21.615	33.555	1.925	0.519	0.853	0	255	532.383		1		54.323
																				94	2147			87.572	45.936	89	6	223	331.735	960.936	0.71	73.348	323	927	101.004	41.159	1.801	0.555	0.927	0	255	491.872		1		45.936
																				95	1104			91.975	35.409	105	8	237	972.406	946.935	0.779	45.88	951	959	20.41	36.556	1.201	0.832	0.905	0	255	462.831		1		35.409
																				96	1684			116.964	58.526	71	0	242	517.855	958.841	0.839	54.589	510	932	118.443	41	1.287	0.777	0.961	0	255	388.141		1		58.526
																				97	757			81.909	40.887	65	1	198	350.438	998.781	0.632	49.244	342	1020	66.038	21.083	2.502	0.4	0.903	0	255	508.459		1		40.887
																				98	1294			108.583	51.541	135	0	230	300.017	997.365	0.793	53.254	277	984	145.713	33.234	1.645	0.608	0.936	0	255	540.153		1		51.541
																				99	510			119.037	39.203	106	13	205	995.051	995.408	0.837	34.205	982	1007	37.875	20.999	1.647	0.607	0.941	0	255	514.373		1		39.203
																				100	975			106.058	34.544	106	5	216	1106.89	1012.9	0.631	59.405	1082	1032	36.098	23.19	2.622	0.381	0.916	0	255	604.011		1		34.544
																				101	2631			109.436	42.29	95	9	210	373.321	1030.78	0.84	71.449	368	1065	83.571	49	1.468	0.681	0.963	0	255	520.725		1		42.29
																				102	948			97.425	43.978	160	15	219	1076.27	1010.87	0.816	44.654	1061	1026	34.046	30.684	1.418	0.705	0.946	0	255	580.595		1		43.978
																				103	755			180.584	59.828	240	41	255	948.125	1014.52	0.823	37.643	937	1000	140.389	29.288	1.225	0.817	0.915	0	255	501.376		1		59.828
																				104	938			67.915	28.605	60	10	170	1038.02	1033.38	0.754	50.606	1016	1047	37.776	25.951	2.01	0.498	0.944	0	255	571.115		1		28.605
																				105	2375			111.634	59.75	49	20	250	668.288	1058.06	0.804	73.756	641	1033	139.399	43.597	1.686	0.593	0.957	0	255	457.995		1		59.75
																				106	704			86.483	44.027	111	0	178	1065.78	1043.08	0.744	43.417	1044	1051	14.676	26	1.712	0.584	0.909	0	255	596.734		1		44.027
																				107	804			140.405	36.08	160	14	214	955.351	1049.87	0.784	41.34	943	1069	57.848	28	1.406	0.711	0.927	0	255	534.843		1		36.08
																				108	1295			138.789	31.55	153	36	216	852.023	1056.96	0.846	50	838	1033	126.87	37.388	1.362	0.734	0.957	0	255	493.317		1		31.55
																				109	2379			91.604	41.98	77	1	232	413.622	1065.38	0.613	85	369	1076	8.797	46.274	1.786	0.56	0.856	0	255	529.331		1		41.98
																				110	1701			85.979	58.176	85	1	254	1004.32	1079.56	0.826	59.034	976	1081	10.739	41.904	1.351	0.74	0.951	0	255	586.841		1		58.176
																				111	2168			135.199	44.791	166	4	235	476.999	1093.1	0.835	66.731	463	1064	119.638	44.603	1.481	0.675	0.962	0	255	528.003		1		44.791
																				112	1193			99.379	60.67	90	7	245	547.008	1090.88	0.844	46.615	526	1082	144.605	35.809	1.253	0.798	0.944	0	255	505.022		1		60.67
																				113	2104			109.008	59.101	99	0	247	569.164	1118.57	0.366	85.071	558	1157	72.204	39.896	2.535	0.394	0.825	0	255	527.459		1		59.101
																				114	1685			120.293	48.343	158	17	245	911.42	1105.59	0.579	73.498	877	1112	14.982	31.833	2.602	0.384	0.853	0	255	561.952		1		48.343
																				115	1667			98.045	50.704	78	1	228	523.349	1119.52	0.764	59.942	515	1091	117.848	42.753	1.337	0.748	0.924	0	255	538.67		1		50.704
																				116	1943			115.014	44.81	74	7	236	649.146	1118.42	0.812	65.299	626	1093	130.03	43.841	1.521	0.657	0.948	0	255	518.624		1		44.81
																				117	4342			104.352	55.754	168	4	251	841.647	1133.42	0.338	99.04	797	1121	163.578	66	1.576	0.635	0.908	0	255	561.536		1		55.754
																				118	1476			95.429	43.582	71	5	247	927.496	1127.44	0.631	70.711	897	1146	28.74	32.165	2.315	0.432	0.905	0	255	588.647		1		43.582
																				119	2163			98.679	43.998	137	6	216	772.668	1157.05	0.779	73.389	737	1147	160.084	40.649	1.811	0.552	0.952	0	255	567.099		1		43.998
																																											1		0
																																											1		0
																																											1		0
																																											1		0
																																											1		0
																																											1		0
																																											1		0
																																											1		0
																																											1		0
																																											1		0
																																											1		0
																																											1		0
																																											1		0
																																											1		0
																																											1		0
																																											1		0
																																											1		0
																																											1		0
																																											1		0
																																											1		0
																																											1		0
																																											1		0
																																											1		0
																																											1		0
																																											1		0
																																											1		0
																																											1		0
																																											1		0
																																											1		0
																																											1		0
																																											1		0
																																											1		0
																																											1		0
																																											1		0
																																											1		0
																																											1		0
																																											1		0
																																											1		0
																																											1		0
																																											1		0
																																											1		0
																																											1		0
																																											1		0
																																											1		0
																																											1		0
																																											1		0
																																											1		0
																																											1		0
																																											1		0
																																											1		0
																																											1		0
																																											1		0
																																											1		0
																																											1		0
																																											1		0
																																											1		0
																																											1		0
																																											1		0
																																29.3874	0
																																20.4129	10
																																14.5262	20
																																14.1198	30
																																14.9503	40
																																16.8558	50
																																19.805	60
																																19.9928	70
																																13.303	80
																																18.1362	90
																																10.8454	100
																																18.585
																																14.5262
																																11.141
																																29.2286
																																21.9864
																																9.48618
																																18.248
																																14.0715
																																16.853
																																9.342
																																23.4958	Bin	Frequency	% Freq
																																16.2943	0	0	0
																																10.6287	10	5	4.20168
																																13.1268	20	89	74.7899
																																14.4256	30	23	19.3277
																																12.892	40	2	1.68067
																																21.5227	50	0	0
																																11.8167	60	0	0
																																15.8204	70	0	0
																																11.5262	80	0	0
																																17.4216	90	0	0
																																17.8912	100	0	0
																																12.319	More	0	0
																																14.3954
																																15.3819
																																19.5463
																																14.0993
																																10.7962
																																14.9245
Bin	0	10	20	30	40	50																										14.0993
	0	4.83659	75.2995	18.8622	0.780975	0.220751																										16.691
	0	0.97587	2.74233	1.30211	0.846603	0.382351																										11.3353
	3	3	3	3	3	3																										16.2408
	0	0.563419	1.58329	0.751774	0.488786	0.220751																										11.4246
																																18.7357
% frequency	0	4.20168	74.7899	19.3277	1.68067	0																										17.4079
	0	5.96026	72.8477	19.8675	0.662252	0.662252																										17.0249
	0	4.34783	78.2609	17.3913	0	0																										19.6378
																																16.3893
																																14.1369
																																21.6305
																																13.7932
																																35.3545
																																14.586
																																8.67467
																																17.2737
																																10.2145
																																19.7194
																																19.7194
																																24.1229
																																18.6242
																																18.8132
																																12.4442
																																16.8788
																																12.3386
																																26.7876
																																19.186
																																23.0626
																																12.4015
																																12.9521
																																18.6554
																																20.4129
																																14.287
																																15.7556
																																11.4203
																																15.3819
																																17.9696
																																14.4761
																																18.7357
																																23.5783
																																18.2879
																																9.24297
																																15.9515
																																9.34729
																																15.3819
																																14.4894
																																21.2506
																																14.202
																																18.3331
																																12.8393
																																17.4633
																																17.7526
																																22.8406
																																14.287
																																16.999
																																15.3346
																																16.5833
																																10.6514
																																18.4987
																																22.2492
																																13.9053
																																11.722
																																15.7587
																																22.9676
																																13.5201
																																12.8733
																																15.57
																																26.469
																																18.3832
																																20.78
																																14.5159
																																26.4911
																																22.8873
																																18.6659
																																20.3341
																																30.8411
																																22.0194
																																22.8533
[truncated: 91 more columns]

## Sheet: FGF22w
0.909646		1.16357
			Overall Means																				A1	BFGF 2w 1702 1300u 20x A-D
Nerve area	Nerve diam	Cells/mm2	Cell#	Av Area	Tot Cell Area	Area frac	Mean	Stdev	Circ.	Feret	%Periph	CentrSD	PeriphSD	C/P Ratio		Nerve area	Nerve Feret (diam)	Centroid X	Centroid Y	Cell#	Area	Tot Area	Area frac	Mean	Stdev	Mode	Min	Max	XM	XY	Circ.	Feret	FeretX	FeretY	FeretAngle	MinFeret	AR	Round	Solidity	Min Thr	Max Thr	Centr dist	%Center	%Periph	CentrSD	PeriphSD		Nerve area	Nerve Feret (diam)
166148	518.954	341.951	56	101.72	5773.87	0.0345672	107.034	40.6998	0.710588	15.4255	67.0597	38.454	42.3961	0.935657		171769	496.24	290.898	240.364	126	110.797	13960.5	0.0812745	100.796	33.5052	100.254	17.7937	190.81			0.725317	15.9118										155.656	25.3968	74.6032	38.3202	31.8661		117126	424.158
52872.7	106.859	270.991	47.5324	26.6265	5505.34	0.0311725	6.85884	5.05199	0.0246192	2.02809	19.3963	7.87807	7.25031	0.273619							42.1662			26.678	8.67058	44.6793	18.6613	32.0723			0.106038	3.36574										55.974			10.168	7.47604
4	4	4	4	4	4	4	4	4	4	4	4	4	4	4						SEM	3.75647			2.37666	0.772436	3.98035	1.66248	2.85723			0.00944659	0.299844										4.98656			1.75663	0.746657
26436.3	53.4294	135.496	23.7662	13.3132	2752.67	0.0155862	3.42942	2.52599	0.0123096	1.01404	9.69816	3.93904	3.62516	0.136809
																1810690	1611.17	944.473	780.404	126	1167.96	147163		100.796	33.5052	100.254	17.7937	190.81			0.725317	51.6618										505.378	25.3968	74.6032	38.3202	31.8661		1234671	1377.13
																					444.491			26.678	8.67058	44.6793	18.6613	32.0723			0.106038	10.9277										181.734			10.168	7.47604
171769	496.24	733.542	126	110.797	13960.5	0.0812745	100.796	33.5052	0.725317	15.9118	74.6032	38.3202	31.8661	1.20254						SEM	39.5984			2.37666	0.772436	3.98035	1.66248	2.85723			0.00944659	0.973518										16.1901			1.75663	0.746657
117126	424.158	179.294	21	114.686	2408.41	0.0205626	105.249	40.9114	0.709952	16.9633	38.0952	37.2748	46.821	0.796112
137798	483.236	312.051	43	62.1205	2671.18	0.0193848	105.265	43.755	0.67614	12.4527	79.0698	29.5209	47.5228	0.621194						1	1251			83.405	32.605	118	0	158	937.147	91.149	0.562	59.059	913	103	28.301	33.229	1.684	0.594	0.84	0	255	689.294		1		32.605
237898	672.18	142.918	34	119.278	4055.44	0.0170469	116.827	44.6275	0.730941	16.3743	76.4706	48.7001	43.3744	1.12279						2	1581			93.211	31.5	111	10	173	997.014	140.966	0.485	63.506	993	105	97.237	42	1.575	0.635	0.811	0	255	641.593		1		31.5
																				3	697			60.839	26.16	45	0	128	959.797	123.926	0.812	34.785	943	125	18.435	27.548	1.163	0.86	0.938	0	255	656.657		1		26.16
																				4	1812			92.78	26.349	116	8	162	1137.65	155.114	0.742	61.294	1125	184	56.31	45.442	1.29	0.775	0.908	0	255	654.45		1		26.349
																				5	947			91.545	43.359	132	0	177	1212.98	156.372	0.787	41.785	1202	140	111.038	34.573	1.107	0.904	0.915	0	255	679.347		1		43.359
																				6	1409			64.919	27.216	54	0	176	907.285	202.137	0.793	49.82	891	185	141.52	41.39	1.075	0.93	0.925	0	255	579.462		1		27.216
																				7	1245			79.578	24.933	86	17	157	1155.63	201.907	0.821	47.011	1133	190	141.911	36.23	1.281	0.781	0.949	0	255	615.829		1		24.933
																				8	1065			64.969	24.025	59	0	151	826.491	202.505	0.765	48.374	802	201	172.875	29.092	1.564	0.64	0.944	0	255	589.819		1		24.025
																				9	945			44.211	25.839	34	0	164	873.807	210.966	0.75	43.829	863	192	124.778	29.822	1.457	0.687	0.917	0	255	573.806		1		25.839
																				10	1858			117.936	33.907	124	17	229	1311.71	226.587	0.668	63.6	1284	220	163.56	47.614	1.366	0.732	0.847	0	255	664.512		1		33.907
																				11	849			99.729	33.551	123	18	198	1000.54	218.209	0.871	39.825	984	207	141.116	31.899	1.138	0.879	0.953	0	255	564.984		1		33.551
																				12	984			87.86	33.346	108	7	156	1348.85	218.147	0.759	48.466	1330	204	158.199	28.279	1.817	0.55	0.945	0	255	692.569		1		33.346
																				13	2085			67.471	37.391	23	0	144	801.812	233.088	0.858	59.933	776	247	25.71	50.093	1.122	0.891	0.969	0	255	565.603		1		37.391
																				14	1189			61.94	31.059	43	0	161	1204.23	258.197	0.85	47.381	1190	240	134.145	37.569	1.199	0.834	0.962	0	255	583.246		1		31.059
																				15	805			35.714	24.67	30	0	128	815.577	267.147	0.551	56.321	784	274	16.504	23.966	2.221	0.45	0.861	0	255	529.195		1		24.67
																				16	1697			85.225	28.488	116	5	143	746.9	282.485	0.708	62.37	721	305	48.9	42.025	1.598	0.626	0.915	0	255	535.685		1		28.488
																				17	688			78.128	37.834	67	9	225	1331.42	274.715	0.841	36.056	1315	271	160.56	28	1.249	0.801	0.946	0	255	636.751		1		37.834
																				18	1383			87.06	39.092	125	0	216	1375.34	283.01	0.649	62.37	1349	262	138.9	32.504	2.02	0.495	0.886	0	255	658.061		1		39.092
																				19	500			74.72	29.671	49	14	172	791.482	285.318	0.793	34.928	775	278	166.759	19	1.782	0.561	0.953	0	255	518.186		1		29.671
																				20	1265			69.844	28.999	95	4	146	765.958	312.4	0.87	47.707	745	324	33.024	35.795	1.323	0.756	0.96	0	255	500.895		1		28.999
																				21	1012			79.556	40.476	48	19	220	904.321	320.143	0.818	44.553	882	325	9.039	32	1.397	0.716	0.945	0	255	462.009		1		40.476
																				22	1460			36.144	29.063	0	0	170	1488.3	336.681	0.577	66.491	1485	302	102.155	32.112	2.306	0.434	0.884	0	255	701.881		1		29.063
																				23	1435			105.995	24.702	128	18	170	1421.59	343.816	0.772	58.669	1396	330	150.376	37.396	1.466	0.682	0.948	0	255	646.724		1		24.702
																				24	3810			129.916	63.066	0	0	250	717.143	358.427	0.717	89.961	682	382	24.286	61.32	1.501	0.666	0.915	0	255	479.316		1		63.066
																				25	1036			40.295	32.941	0	0	155	1527.13	361.234	0.568	62.968	1511	337	133.069	27.346	2.431	0.411	0.875	0	255	717.769		1		32.941
																				26	1831			74.792	32.396	0	0	190	849.443	423.771	0.624	63.253	826	442	39.226	48.671	1.224	0.817	0.843	0	255	369.077	1		32.396
																				27	1361			66.843	30.036	39	5	149	680.039	424.155	0.818	54.406	656	439	36.027	34.118	1.56	0.641	0.959	0	255	443.665		1		30.036
																				28	938			81.767	30.14	89	0	181	1550.62	420.051	0.709	44.553	1528	428	9.039	31.977	1.468	0.681	0.896	0	255	705.177		1		30.14
																				29	905			61.123	27.011	63	5	154	1585.96	458.373	0.593	55.218	1565	443	144.583	23.22	2.73	0.366	0.852	0	255	717.777		1		27.011
																				30	1678			69.486	34.719	59	0	164	655.586	459.43	0.724	63.388	625	467	6.34	37.147	1.904	0.525	0.921	0	255	431.833		1		34.719
																				31	1383			174.73	48.759	232	45	255	1192.7	462.598	0.707	58.822	1170	481	35.311	36.77	1.485	0.673	0.913	0	255	403.261		1		48.759
																				32	969			108.563	27.101	124	16	186	1631.28	483.173	0.533	58.31	1624	454	112.166	32.484	1.718	0.582	0.802	0	255	748.36		1		27.101
																				33	1836			112.851	32.574	129	0	184	1548.25	493.999	0.511	74.095	1526	455	121.759	45.602	1.622	0.617	0.813	0	255	668.26		1		32.574
																				34	1063			85.045	36.787	120	1	173	612.583	481.813	0.692	49.396	594	504	58.241	34.553	1.301	0.769	0.897	0	255	446.439		1		36.787
																				35	840			84.256	39.894	72	0	203	916.893	483.055	0.758	40.46	904	470	140.013	31.017	1.306	0.766	0.907	0	255	298.625	1		39.894
																				36	662			105.654	21.647	121	26	150	675.246	491.829	0.795	35.171	664	476	104.826	26.974	1.324	0.756	0.938	0	255	394.663	1		21.647
																				37	1127			106.783	31.61	120	15	210	1587.86	514.327	0.599	60.638	1578	543	76.651	29.177	2.208	0.453	0.842	0	255	696.235		1		31.61
																				38	1138			70.677	38.642	43	1	223	725.504	500.264	0.782	53.367	700	493	167.005	31.687	1.596	0.626	0.942	0	255	355.564	1		38.642
																				39	1956			132.253	41.987	146	0	249	973.768	530.01	0.608	73.055	963	558	70.821	45.267	1.536	0.651	0.844	0	255	252.102	1		41.987
																				40	1164			122.084	54.566	89	9	249	1287.64	509.935	0.637	60.926	1258	525	23.199	28.145	2.359	0.424	0.91	0	255	436.937		1		54.566
																				41	1298			110.923	35.104	136	17	175	616.961	524.395	0.784	48.662	608	548	80.538	37.892	1.213	0.825	0.927	0	255	415.698		1		35.104
																				42	809			120.378	25.668	135	50	189	564.485	524.701	0.776	42.059	555	540	61.607	28.991	1.446	0.692	0.942	0	255	458.012		1		25.668
																				43	1019			105.537	30.179	118	24	205	1627.11	524.138	0.799	42.521	1612	541	48.814	35.873	1.189	0.841	0.945	0	255	729.156		1		30.179
																				44	712			144.844	36.101	140	39	224	924.831	542.096	0.725	42.19	906	532	148.57	23.781	1.807	0.553	0.906	0	255	239.116	1		36.101
																				45	1392			145.239	28.653	152	48	250	1241.94	558.442	0.709	58.694	1229	580	66.93	36.192	1.556	0.643	0.93	0	255	371.153	1		28.653
																				46	999			112.553	35.03	119	23	234	690.214	541.398	0.619	57.723	664	544	14.036	23.648	2.557	0.391	0.938	0	255	348.958	1		35.03
																				47	1502			105.07	37.898	138	13	188	539.19	570.691	0.564	71.694	517	600	67.011	29.681	2.489	0.402	0.908	0	255	456.326		1		37.898
																				48	975			106.271	23.92	119	27	165	1639.87	562.959	0.629	52.154	1645	591	85.601	31.533	1.526	0.655	0.895	0	255	728.601		1		23.92
																				49	1726			96.237	27.764	89	21	191	497.555	579.688	0.77	55.227	483	600	42.064	48.71	1.035	0.966	0.951	0	255	489.921		1		27.764
																				50	1709			120.026	39.381	132	0	233	1672.56	586.97	0.819	58.6	1664	560	115.253	43.322	1.315	0.761	0.964	0	255	753.343		1		39.381
																				51	780			109.762	42.996	92	18	249	1026.24	585.938	0.662	47.127	1020	613	72.719	29	1.49	0.671	0.854	0	255	210.958	1		42.996
																				52	1453			117.094	42.157	112	19	236	769.752	604.699	0.576	67.082	768	577	100.305	40.481	1.661	0.602	0.867	0	255	247.79	1		42.157
																				53	834			99.205	27.7	105	27	171	478.173	616.772	0.808	40.162	458	623	18.886	30.914	1.268	0.789	0.93	0	255	494.177		1		27.7
																				54	1437			95.718	30.384	113	3	199	1696.06	641.954	0.699	64.14	1680	619	120.964	31.126	2.032	0.492	0.947	0	255	764.235		1		30.384
																				55	1641			99.267	39.894	114	0	239	510.872	650.594	0.836	53.16	503	678	73.61	42.503	1.229	0.813	0.96	0	255	452.615		1		39.894
																				56	809			102.384	32.086	120	21	178	382.345	648.708	0.819	42.059	364	640	151.607	27.123	1.563	0.64	0.938	0	255	577.349		1		32.086
																				57	1284			91.262	63.914	0	0	252	1096.06	655.485	0.647	59.237	1070	664	21.801	35.98	1.724	0.58	0.853	0	255	196.426	1		63.914
																				58	616			66.955	26.561	55	18	158	540.669	679.25	0.838	33.956	536	696	76.373	24.757	1.323	0.756	0.933	0	255	416.281		1		26.561
																				59	1556			79.796	27.546	71	0	151	1694.62	690.292	0.827	57.271	1683	663	114.775	39.598	1.472	0.68	0.954	0	255	755.54		1		27.546
																				60	819			101.884	32.814	112	20	206	1623.59	683.228	0.824	39.699	1607	671	139.086	30.433	1.269	0.788	0.929	0	255	686.034		1		32.814
																				61	1101			107.67	40.804	103	6	228	854.779	703.15	0.455	57.271	854	676	102.095	37.969	1.33	0.752	0.705	0	255	118.377	1		40.804
																				62	1767			125.381	47.473	123	0	237	942.347	699.872	0.846	59.135	914	708	18.741	41.789	1.341	0.746	0.957	0	255	80.5601	1		47.473
																				63	1664			136.394	62.748	94	0	255	717.507	710.487	0.741	66.287	684	701	168.69	34.979	1.88	0.532	0.951	0	255	237.491	1		62.748
																				64	767			73.432	28.082	49	9	149	1617.86	736.98	0.767	38.897	1597	731	162.031	30	1.183	0.846	0.926	0	255	674.782		1		28.082
																				65	993			110.881	26.194	123	38	176	994.214	743.131	0.728	51.546	972	753	18.083	28.933	1.76	0.568	0.918	0	255	62.1566	1		26.194
																				66	2047			92.005	26.96	114	23	150	1712.17	761.484	0.666	78.549	1698	729	111.666	42.55	1.76	0.568	0.928	0	255	767.935		1		26.96
																				67	574			93.594	40.147	95	13	213	837.723	750.929	0.853	34.015	822	745	155.695	23.454	1.424	0.702	0.939	0	255	110.744	1		40.147
																				68	916			72.341	26.407	55	11	163	1662.76	758.366	0.847	38.897	1653	741	133.958	32.587	1.167	0.857	0.945	0	255	718.624		1		26.407
																				69	1706			138.137	41.925	111	52	240	774.247	781.412	0.597	66.098	772	747	100.46	39.577	2.028	0.493	0.837	0	255	170.229	1		41.925
																				70	887			146.557	24.214	149	62	217	1309.06	777.882	0.727	42.953	1303	757	102.095	28.908	1.585	0.631	0.898	0	255	364.595	1		24.214
																				71	1083			77.419	27.738	103	8	167	463.379	796.468	0.633	50.478	444	782	146.31	32.527	1.554	0.644	0.854	0	255	481.362		1		27.738
																				72	761			74.389	42.453	0	0	198	517.277	790.704	0.865	38.833	509	807	55.491	27.619	1.423	0.702	0.955	0	255	427.32		1		42.453
																				73	1610			94.364	51.38	81	0	255	740.494	801.722	0.756	60.415	729	832	61.314	39.75	1.473	0.679	0.945	0	255	205.09	1		51.38
																				74	1312			112.457	40.832	84	28	216	1431.8	798.866	0.787	55.227	1408	813	31.675	35.193	1.63	0.614	0.947	0	255	487.677		1		40.832
																				75	997			90.897	32.345	107	0	156	1706.3	821.678	0.758	45.222	1705	800	108.034	28.999	1.485	0.673	0.926	0	255	762.941		1		32.345
																				76	1149			95.244	26.447	106	25	177	435.074	822.053	0.692	54.918	409	835	10.491	29	1.924	0.52	0.914	0	255	511.099		1		26.447
																				77	1315			88.681	29.05	71	19	191	1604.77	829.102	0.829	44.777	1589	815	150.573	42.079	1.026	0.975	0.943	0	255	662.094		1		29.05
																				78	840			124.879	27.239	146	26	173	657.739	845.532	0.821	43.417	641	830	141.546	27.188	1.574	0.635	0.952	0	255	294.037	1		27.239
																				79	1904			141.165	36.346	132	10	221	847.16	876.49	0.826	59.481	837	906	73.393	42.032	1.398	0.716	0.945	0	255	136.756	1		36.346
																				80	1523			158.085	37.02	153	67	234	1042.57	894.416	0.764	54.231	1042	923	67.218	38.825	1.39	0.719	0.936	0	255	150.405	1		37.02
																				81	1304			77.073	39.784	53	0	182	491.492	893.804	0.815	47.202	477	873	126.384	39.617	1.19	0.84	0.935	0	255	466.96		1		39.784
																				82	560			120.895	32.571	98	57	219	1304.88	889.684	0.83	30.364	1292	899	17.241	26.254	1.141	0.876	0.926	0	255	376.607	1		32.571
																				83	1265			95.021	24.333	96	27	232	522.339	926.151	0.819	48.052	514	904	102.011	35.9	1.248	0.801	0.953	0	255	446.586		1		24.333
																				84	1262			102.726	50.408	118	8	223	893.39	935.293	0.853	48.021	874	951	31.373	36.871	1.264	0.791	0.958	0	255	163.095	1		50.408
																				85	578			54.6	39.893	0	0	161	490.811	933.702	0.787	35.468	485	951	68.499	25	1.446	0.691	0.923	0	255	478.863		1		39.893
																				86	707			69.47	27.632	86	0	139	580.718	950.262	0.835	38.288	566	937	139.236	26.715	1.433	0.698	0.948	0	255	401.459	1		27.632
																				87	1131			130.465	31.321	151	27	199	1121.91	952.511	0.773	51.74	1105	970	41.082	32.21	1.462	0.684	0.948	0	255	247.195	1		31.321
																				88	1414			110.016	32.831	125	0	179	549.174	964.58	0.696	54.589	536	945	118.443	37.466	1.484	0.674	0.885	0	255	436.099		1		32.831
																				89	836			103.231	26.159	117	19	190	492.84	971.562	0.69	42.802	484	954	127.405	32.975	1.009	0.991	0.884	0	255	490.422		1		26.159
																				90	973			109.208	18.948	109	27	150	534.103	993.628	0.646	55.073	522	971	119.358	32.18	1.581	0.633	0.901	0	255	462.459		1		18.948
																				91	1569			125.361	27.664	128	53	212	902.044	1006.34	0.618	62.008	888	1032	52.206	43.526	1.433	0.698	0.832	0	255	229.889	1		27.664
																				92	1372			148.544	48.081	159	0	239	994.481	1030.17	0.751	56.727	973	1049	40.711	38.015	1.539	0.65	0.948	0	255	254.727	1		48.081
																				93	1277			157.468	47.831	205	33	221	742.331	1072.97	0.64	59.548	717	1094	40.914	32.341	1.942	0.515	0.863	0	255	355.606	1		47.831
																				94	934			124.954	38.215	154	38	217	1149.95	1104.57	0.787	42.72	1143	1126	73.686	29.969	1.464	0.683	0.929	0	255	383.803	1		38.215
																				95	1104			88.648	36.777	77	5	194	1631.07	1109.34	0.515	71.218	1604	1130	38.157	23.335	3.434	0.291	0.874	0	255	761.324		1		36.777
																				96	880			108.785	25.369	119	38	171	651.434	1112.1	0.641	54.129	626	1101	154.855	27.516	1.877	0.533	0.894	0	255	442.599		1		25.369
																				97	932			91.545	29.421	86	29	151	690.171	1119.76	0.723	51.313	677	1101	123.071	28.025	1.878	0.532	0.941	0	255	424.062		1		29.421
																				98	745			125.938	26.381	142	17	180	1488.43	1117.38	0.791	36.125	1470	1118	175.236	27.723	1.341	0.746	0.923	0	255	639.877		1		26.381
																				99	853			91.637	30.182	77	0	176	1561.49	1124.82	0.767	43.932	1543	1108	131.309	29.698	1.449	0.69	0.934	0	255	706.629		1		30.182
																				100	1249			99.453	32.365	79	29	172	839.177	1130.81	0.743	54.672	822	1150	39.806	34.002	1.551	0.645	0.928	0	255	365.889	1		32.365
																				101	1264			115.177	31.25	143	0	170	883.191	1139.18	0.64	62.642	873	1171	73.301	29	2.273	0.44	0.907	0	255	363.968	1		31.25
																				102	754			127.915	23.893	142	49	171	732.873	1135.8	0.799	37.696	715	1139	21.801	29	1.161	0.861	0.941	0	255	413.616		1		23.893
																				103	1930			102.134	32.822	89	0	194	677.701	1153.45	0.303	75.213	645	1127	125.803	42.795	1.755	0.57	0.822	0	255	458.619		1		32.822
																				104	644			124.085	35.323	104	38	192	1212.6	1141.68	0.839	33.242	1197	1146	15.709	28.034	1.205	0.83	0.917	0	255	449.9		1		35.323
																				105	1272			97.943	37.958	79	11	183	1598.89	1153.1	0.761	57.385	1577	1174	41.468	33.234	1.805	0.554	0.957	0	255	753.098		1		37.958
																				106	1028			135.626	55.35	208	0	225	806.757	1164.97	0.815	43.566	785	1159	170.754	33	1.315	0.76	0.945	0	255	408.478		1		55.35
																				107	511			89.552	20.907	100	41	144	746.248	1185.35	0.658	37.336	729	1185	172.304	22.769	1.733	0.577	0.836	0	255	450.855		1		20.907
																				108	712			102.065	32.688	128	8	190	1464.93	1190.29	0.689	43.417	1447	1177	151.074	26.578	1.708	0.586	0.904	0	255	662.48		1		32.688
																				109	925			123.852	24.181	144	50	188	1429.21	1209.57	0.846	42.426	1408	1206	171.87	31.849	1.288	0.776	0.943	0	255	647.416		1		24.181
																				110	896			106.911	33.091	136	30	200	1479.2	1217.99	0.771	42.379	1461	1209	160.71	29.351	1.303	0.768	0.929	0	255	690.953		1		33.091
																				111	1766			88.595	27.872	80	18	162	1533.75	1232.63	0.868	54.918	1510	1249	33.111	43.841	1.209	0.827	0.961	0	255	742.803		1		27.872
																				112	1330			147.18	31.905	143	57	223	854.56	1255.36	0.786	50	831	1248	163.74	39.588	1.197	0.835	0.923	0	255	483.388		1		31.905
																				113	889			130.684	18.82	128	74	188	816.519	1273.79	0.819	40.804	800	1289	53.973	31.756	1.266	0.79	0.951	0	255	509.712		1		18.82
																				114	656			116.547	27.932	134	31	168	1460.77	1270.48	0.633	49.679	1442	1286	40.101	18.611	2.583	0.387	0.93	0	255	711.858		1		27.932
																				115	1198			129.11	28.3	146	50	182	1494.73	1272.08	0.687	58.523	1468	1284	16.887	28.659	2.072	0.483	0.932	0	255	737.924		1		28.3
																				116	1241			65.481	28.733	46	16	156	762.062	1279.63	0.819	50.249	743	1262	148.841	32.233	1.577	0.634	0.944	0	255	531.509		1		28.733
																				117	610			86.492	33.404	62	23	209	817.185	1301.38	0.652	42.426	797	1304	171.87	19.7	2.036	0.491	0.902	0	255	536.301		1		33.404
																				118	1070			123.064	35.367	144	37	210	1391.33	1316.74	0.631	46.615	1372	1331	22.714	35.759	1.364	0.733	0.867	0	255	698.096		1		35.367
																				119	977			82.018	39.344	58	25	231	820.862	1323.31	0.784	45.706	798	1315	169.919	27	1.653	0.605	0.944	0	255	556.798		1		39.344
																				120	878			69.867	38.166	0	0	167	874.869	1331.62	0.82	43.186	853	1332	5.315	27	1.483	0.674	0.947	0	255	555.593		1		38.166
																				121	855			129.689	23.581	141	12	173	1308.7	1349.22	0.733	48.374	1285	1357	29.745	28.284	1.766	0.566	0.942	0	255	675.438		1		23.581
																				122	820			123.346	25.016	125	66	195	1345.59	1349.02	0.746	42.755	1327	1355	10.784	28.176	1.432	0.698	0.908	0	255	695.852		1		25.016
																				123	986			120.353	27.903	117	42	183	1263.04	1378.3	0.632	53.413	1240	1390	38.157	28.508	1.882	0.531	0.896	0	255	677.474		1		27.903
																				124	1236			133.684	24.414	136	63	185	1246	1413.74	0.61	67.476	1216	1408	173.191	28	2.226	0.449	0.955	0	255	701.455		1		24.414
																				125	887			104.984	41.173	118	9	188	1042.33	1424.67	0.714	44.385	1020	1422	157.479	29.455	1.476	0.677	0.892	0	255	651.653		1		41.173
																				126	738			114.626	36.434	151	31	200	1004.95	1434.23	0.45	61.4	979	1426	163.926	17.236	3.641	0.275	0.861	0	255	656.62		1		36.434
																																18.1902	0
																																19.5598	10
																																10.7138	20
																																18.8786	30
																																12.8698	40
																																15.3446	50
																																14.4794	60
																																14.8992	70
																																13.4993	80
																																19.5888	90
																																12.2661	100
																																14.9275
																																18.4594
																																14.5933
																																17.3469
																																19.21
																																11.1052
																																19.21
																																10.7578
																																14.6938
																																13.7223
																																20.4792	Bin	Frequency	% Freq
																																18.0701	0	0	0
																																27.708	10	1	0.793651
																																19.3941	20	113	89.6825
																																19.4819	30	12	9.52381
																																16.757	40	0	0
																																13.7223	50	0	0
																																17.0071	60	0	0
																																19.5235	70	0	0
																																18.1172	80	0	0
																																17.9595	90	0	0
																																22.8213	100	0	0
																																15.214	More	0	0
																																12.4617
																																10.8327
																																18.6765
																																16.437
																																22.5009
																																18.7652
Bin	0	10	20	30	40	50																										14.9879
	0	10.4453	76.0743	12.7451	0.735294	0																										12.9542
	0	10.7071	9.71091	10.3161	1.47059	0																										13.0965
	4	4	4	4	4	4																										12.9945
	0	5.35355	4.85546	5.15804	0.735294	0																										18.0778
																																17.7787
% frequency	0	0.793651	89.6825	9.52381	0	0																										22.0818
	0	9.52381	66.6667	23.8095	0	0																										16.0634
	0	25.5814	74.4186	0	0	0																										17.0099
	0	5.88235	73.5294	17.6471	2.94118	0																										18.0488
																																14.5151
																																20.6613
																																12.3699
																																19.7551
																																16.3733
																																12.9542
																																18.245
																																10.4584
																																17.6395
																																12.2273
																																17.6395
																																18.2136
																																20.4164
																																11.9803
																																15.8762
																																24.1931
																																10.4766
																																11.9803
																																20.3582
																																13.2295
																																15.5472
																																11.9606
																																18.6078
																																17.0099
																																13.9284
																																16.9147
																																13.7913
																																13.3724
																																18.3201
																																16.7031
																																14.5382
																																9.35211
																																14.8
																																14.7905
																																10.9241
																																11.7927
																																15.9359
																																16.8134
																																13.183
																																16.9625
																																19.0985
																																17.4719
																																18.3408
																																13.1578
																																21.9351
																																16.6717
																																15.8044
																																11.1265
																																13.5311
																																16.839
																																19.2937
																																11.6104
																																23.1656
																																10.2385
																																17.6746
																																13.4183
																																11.4995
																																13.3724
																																13.0672
																																13.0527
																																16.9147
																																15.4
																																12.5676
																																15.3011
																																18.0251
																																15.4767
																																13.0672
																																14.3574
																																14.0774
																																13.3013
																																14.8992
																																13.1685
																																16.4512
																																20.7826
																																13.6706
																																18.9112
[truncated: 91 more columns]

## Sheet: ANOVA2w
Nerve area
	A	B	C				PBS	CNTF	FGF2
A		0.7934	0.8801			PBS		ns	ns
B	0.9303		0.9839			CNTF			ns
C	0.6867	0.2437				FGF2
Cell #
	A	B	C				PBS	CNTF	FGF2
A		0.04191	0.9896			PBS		*	ns
B	4.214		0.05131			CNTF			ns
C	0.1958	4.018				FGF2
Cells/area
	A	B	C				PBS	CNTF	FGF2
A		0.03881	0.9674			PBS		*	ns
B	4.289		0.05563			CNTF			ns
C	0.3479	3.941				FGF2
Cell average area
	A	B	C				PBS	CNTF	FGF2
A		0.973	0.8124			PBS		ns	ns
B	0.3159		0.687			CNTF			ns
C	0.8803	1.196				FGF2
Cell Area Fraction
	A	B	C				PBS	CNTF	FGF2
A		0.06548	0.9995			PBS		ns	ns
B	3.784		0.06875			CNTF			ns
C	0.047	3.737				FGF2
